## INTRACELLULAR CALCIUM TRANSLOCATION: MECHANISM OF ACTIVATION BY GUANINE NUCLEOTIDES AND INOSITOL PHOSPHATES

BY DONALD L. GILL, JULIENNE M. MULLANEY  
AND TARUN K. GHOSH

*Department of Biological Chemistry, University of Maryland School of  
Medicine, Baltimore, MD 21201, USA*

### Summary

The movements of  $\text{Ca}^{2+}$  within cells in response to external stimuli are complex. Internal  $\text{Ca}^{2+}$  release activated by inositol 1,4,5-trisphosphate ( $\text{InsP}_3$ ) is now widely established. However, the mechanism of  $\text{InsP}_3$ -induced  $\text{Ca}^{2+}$  release, the identity and control of the  $\text{InsP}_3$ -sensitive  $\text{Ca}^{2+}$  pool and its relationship to other internal and external  $\text{Ca}^{2+}$  pools all remain uncertain. We have characterized a highly sensitive and specific guanine nucleotide-regulatory mechanism that induces rapid and profound movements of intracellular  $\text{Ca}^{2+}$  *via* a mechanism distinct from that activated by  $\text{InsP}_3$ . Using permeabilized neural or smooth muscle cells, application of submicromolar concentrations of GTP induces rapid release of  $\text{Ca}^{2+}$  from a compartment that contains within it the  $\text{InsP}_3$ -releasable  $\text{Ca}^{2+}$  pool. Although of similar GTP-sensitivity as G-protein-activated events, the apparent dependence on GTP hydrolysis and blockade by  $\text{GTP}\gamma\text{S}$  suggest a mechanism distinct from those mediated by known G-proteins. Recent experiments in the presence of oxalate reveal rapid and profound GTP-activated *uptake* of  $\text{Ca}^{2+}$  *via* a mechanism with identical nucleotide sensitivity and specificity to GTP-induced  $\text{Ca}^{2+}$  release. These results were interpreted to suggest that GTP induces a transmembrane conveyance of  $\text{Ca}^{2+}$  between different compartments distinguished by oxalate permeability; GTP-induced release probably occurs *via* a similar mechanism except involving transfer between closed compartments and nonclosed membranes (perhaps the plasma membrane). Recently, it has been revealed that GTP activates a translocation of  $\text{Ca}^{2+}$  into the  $\text{Ca}^{2+}$  pool from which  $\text{InsP}_3$  induces release. This is an important observation suggesting that the GTP-activated  $\text{Ca}^{2+}$  translocation process may control entry into and hence the size of the  $\text{InsP}_3$ -releasable  $\text{Ca}^{2+}$  pool. Indeed, it is possible that GTP-induced  $\text{Ca}^{2+}$  release observed in permeabilized cells reflects a reversal of the pathway that functions in intact cells to permit external  $\text{Ca}^{2+}$  entry into the  $\text{InsP}_3$ -releasable pool. This type of process could mediate the longer-term secretory or excitatory responses to external receptors which are known to be dependent on external  $\text{Ca}^{2+}$ .

### Calcium signalling events in cells

 It is now well recognized that  $\text{Ca}^{2+}$  plays a pivotal regulatory role within cells,

Key words: calcium, inositol phosphates, GTP, endoplasmic reticulum.

both as an intracellular mediator of receptor-activated signalling, and in the control of a multitude of cellular processes notable among which is the secretory event. The recent elucidation of the mechanisms coupling cell-surface receptors to  $\text{Ca}^{2+}$  mobilization in cells, based on the early observations of Hokin & Hokin (1953), has now established in principle the relationship between receptor-induced phosphoinositide breakdown and inositol phosphate-mediated  $\text{Ca}^{2+}$  release (Berridge & Irvine, 1984; Gill, 1985; Majerus *et al.* 1986; Berridge, 1987). In spite of the fact that much is now known about the phosphoinositide signalling pathway, it should be noted that the regulation of  $\text{Ca}^{2+}$  within cells involves a complex set of events. Thus,  $\text{Ca}^{2+}$  signalling occurs through the subtle alteration of one or more of an array of distinct transport mechanisms, located in a number of discrete organelles, and influenced by numerous intracellular regulatory systems. It is the purpose of this chapter to review some intriguing recent developments concerning the control of intracellular  $\text{Ca}^{2+}$  movements and their possible relationship to what has been ascertained on the processes that mediate  $\text{Ca}^{2+}$  signalling events within cells. In the first section, certain of the characteristics of  $\text{Ca}^{2+}$  regulatory organelles and their role in  $\text{Ca}^{2+}$  signalling are considered.

#### *Cellular sites of calcium regulation*

The transfer of  $\text{Ca}^{2+}$  across membranes within cells is controlled by a number of distinct classes of active or passive transport mechanisms (see Carafoli, 1987). The cytosol of most mammalian cells contains approximately  $0.1 \mu\text{mol l}^{-1}$  free  $\text{Ca}^{2+}$  under resting conditions, compared with the low millimolar free  $\text{Ca}^{2+}$  concentration outside cells. This 10 000-fold gradient of free  $[\text{Ca}^{2+}]$  across the plasma membrane is actively maintained *via* ATP-dependent  $\text{Ca}^{2+}$  pumping, and perhaps also *via* the  $\text{Na}^+/\text{Ca}^{2+}$  exchanger (Gill, 1982a).  $\text{Ca}^{2+}$  translocation *via* voltage-sensitive  $\text{Ca}^{2+}$  channels is a well-established route of entry of extracellular  $\text{Ca}^{2+}$  into excitable cells and perhaps many other cell types (Miller, 1987). Moreover, it is clear now that activation of such channels can be finely controlled by intracellular messenger-mediated phosphorylation events (Tsien *et al.* 1986; Miller, 1987). In addition, many have considered that  $\text{Ca}^{2+}$  entry across the plasma membrane may be *directly* mediated by activation of channels distinct from voltage-sensitive  $\text{Ca}^{2+}$  channels (Gill, 1982a; Tsien *et al.* 1986; Miller, 1987). The existence and characterization of such channels has not been conclusively described. However, it seems clear that at least the prolonged responses to many  $\text{Ca}^{2+}$ -coupled receptors are dependent on external  $\text{Ca}^{2+}$  and may involve entry of  $\text{Ca}^{2+}$  across the plasma membrane (Putney, 1986), as discussed later.

It has become increasingly clear that, in addition to the plasma membrane, internal organelles also play an important role in the maintenance of cytosolic  $[\text{Ca}^{2+}]$ . Mitochondria are known actively to accumulate  $\text{Ca}^{2+}$  (see Hansford, 1985) *via* a process dependent on the membrane potential existing across the internal membrane. However, from most observations it appears that mitochondria can only accumulate  $\text{Ca}^{2+}$  when free  $\text{Ca}^{2+}$  levels are high, that is, at or above  $1\text{--}10 \mu\text{mol l}^{-1}$ ; thus it is unlikely that they contribute directly either to the

maintenance of physiological cytosolic  $\text{Ca}^{2+}$  levels or to the induction of  $\text{Ca}^{2+}$ -signalling events within cells. In contrast, it appears certain that other  $\text{Ca}^{2+}$ -accumulating organelles within cells are active in both respects. Thus, endoplasmic reticulum (ER) in a variety of cell types has been observed to sequester large quantities of  $\text{Ca}^{2+}$  (Henkart, Reese & Brinley, 1978; McGraw, Somlyo & Blaustein, 1980; Wakasugi *et al.* 1982; Burton & Laveri, 1985). Using permeabilized nonmuscle cells, it is clear from a number of different studies that nonmitochondrial organelle(s) exist which accumulate  $\text{Ca}^{2+}$  *via* high-affinity (ATP +  $\text{Mg}^{2+}$ )-dependent  $\text{Ca}^{2+}$  pumping activity (see, for example, Burgess *et al.* 1983; Gill & Chueh, 1985). Such internal  $\text{Ca}^{2+}$  pumps are analogous in function to those of the plasma membrane. However, a number of features distinguish the internal and plasma membrane pumping activities (Gill & Chueh, 1985). Interestingly, these distinguishing characteristics are remarkably consistent with those features which serve to distinguish sarcolemmal and sarcoplasmic reticulum (SR)  $\text{Ca}^{2+}$  pumps in muscle tissue (Carafoli, 1987). Thus, it has been suggested that ER in nonmuscle cells may fulfil at least some of the specialized  $\text{Ca}^{2+}$  regulatory functions ascribed to SR in muscle. However, although analogies exist with respect to  $\text{Ca}^{2+}$  accumulation, it is becoming increasingly apparent that the  $\text{Ca}^{2+}$  release mechanisms of SR and ER are quite distinct. It should also be noted that whereas the SR is a structurally identifiable organelle with a clearly defined  $\text{Ca}^{2+}$ -regulatory function, the role of ER in  $\text{Ca}^{2+}$  signalling within nonmuscle tissues is considerably more tenuous. Thus, the involvement of ER in  $\text{Ca}^{2+}$ -mobilizing events is concluded from indirect evidence with, as yet, no proven localization of these mechanisms to this specific organelle. Indeed, recent evidence presented by Volpe *et al.* (1988) suggests that  $\text{Ca}^{2+}$ -accumulating organelles which are *distinct* from ER may be involved in  $\text{Ca}^{2+}$ -regulatory responses in cells. These organelles have been termed 'calciosomes' and their existence and function are described in detail in the chapter by Pozzan in this volume (Pozzan *et al.* 1988). In spite of the imprecise identity of  $\text{Ca}^{2+}$ -releasing organelles, ER is frequently referred to as being the organelle from which  $\text{Ca}^{2+}$  release occurs in response to inositol phosphates, the actions of which are discussed next.

#### *Role of inositol phosphates in calcium signalling*

Considerable advances in the understanding of the nature of  $\text{Ca}^{2+}$ -signalling events within cells have been derived from elucidation of the pathways for metabolism and action of the inositol phosphates derived from receptor-mediated phospholipase C activation (Berridge, 1987). An overview of the role of phosphoinositide metabolism in signal transduction and the control of secretion is given in the chapter by Putney in this volume (Putney, 1988). It is currently held that an important direct product of phosphoinositide breakdown is inositol 1,4,5-trisphosphate (together with its 1,2-cyclic derivative), and that this molecule has proven effectiveness in releasing intracellular  $\text{Ca}^{2+}$  in a large variety of cells. The metabolism of this product is complex. Although it is not the purpose of the present chapter to describe the intricate processes involved in formation and

breakdown of each of the products, brief mention of the major derivatives is given here since certain of these may also have roles in modifying  $\text{Ca}^{2+}$  movements in cells.  $\text{Ins}(1,4,5)\text{P}_3$  undergoes either phosphorylation or dephosphorylation. 5'-Phosphatase activity in cells cleaves  $\text{InsP}_3$  to the less active  $\text{Ins}(1,4)\text{P}_2$  product. Alternatively, 3'-kinase activity can phosphorylate  $\text{InsP}_3$  to produce inositol 1,3,4,5-tetrakisphosphate ( $\text{InsP}_4$ ), which is itself a substrate for the 5'-phosphatase, producing in this case inositol 1,3,4-trisphosphate. Whereas the latter molecule has very much less  $\text{Ca}^{2+}$ -releasing activity than  $\text{Ins}(1,4,5)\text{P}_3$ , the  $\text{InsP}_4$  molecule has been reported to exert indirect effects on  $\text{Ca}^{2+}$  mobilization (Irvine & Moor, 1986, 1987; Morris, Gallacher, Irvine & Petersen, 1987). Thus  $\text{InsP}_4$  was observed by Irvine & Moor (1986, 1987) to induce  $\text{Ca}^{2+}$ -mediated effects in oocytes; these effects appear to be dependent on the presence of  $\text{InsP}_3$  and also to require external  $\text{Ca}^{2+}$ . Interpretation of the results may imply that  $\text{InsP}_4$  induces the entry of  $\text{Ca}^{2+}$  into the  $\text{InsP}_3$ -releasable pool, perhaps from outside the cell (Michell, 1986; Irvine & Moor, 1987). In a recent report, Morris *et al.* (1987) described a similar synergism between the effects of  $\text{InsP}_3$  and  $\text{InsP}_4$  on activation of  $\text{K}^+$  channels in lacrimal gland; similar conclusions on the possible permissive effect of  $\text{InsP}_4$  on the action of  $\text{InsP}_3$ -mediated  $\text{Ca}^{2+}$  mobilization were presented. More direct synergistic effects of  $\text{InsP}_3$  and  $\text{InsP}_4$  on  $\text{Ca}^{2+}$  have been reported by Spät *et al.* (1987). Thus, it was observed that the extent of  $\text{InsP}_3$ -mediated  $\text{Ca}^{2+}$  release from liver microsomal membrane vesicles was significantly increased in the presence of  $\text{InsP}_4$ . At present, although it seems likely that  $\text{InsP}_4$  does exert effects, it is unclear whether it may directly control  $\text{Ca}^{2+}$  fluxes, whether it modifies the  $\text{InsP}_3$ -induced release process, or whether it has indirect effects through alteration of the metabolism of  $\text{InsP}_3$ , for example by competing with  $\text{InsP}_3$  at the 5'-phosphatase level.

Studies by Muallem, Schoeffield, Pandol & Sachs (1985) suggest that the action of  $\text{InsP}_3$  on the release of  $\text{Ca}^{2+}$  from what is believed to be ER occurs *via* a process that resembles activation of a channel. This conclusion has been drawn from a number of observations including the remarkably temperature-insensitive activation of  $\text{Ca}^{2+}$  release in response to  $\text{InsP}_3$  (Smith, Smith & Higgins, 1985; Chueh & Gill, 1986). Direct electrophysiological evidence for an  $\text{InsP}_3$ -activated channel has not yet been published; however, promising results have been discussed and more definitive studies are expected. Studies using labelled  $\text{InsP}_3$  have identified a binding site for  $\text{InsP}_3$  within cells, with kinetics and specificity similar to that for activation of  $\text{Ca}^{2+}$  release (Baukal *et al.* 1985; Spät *et al.* 1986; Worley *et al.* 1987). The isolation of an  $\text{InsP}_3$ -binding protein, which was purified by heparin affinity-chromatography, has recently been reported by Supattapone, Worley, Baraban & Snyder (1988). Indeed, our own recent evidence (Ghosh *et al.* 1988), which shows a profound antagonistic effect of heparin on the action of  $\text{InsP}_3$  on  $\text{Ca}^{2+}$  release from within cells, strongly suggests that the binding protein isolated by Supattapone *et al.* is the physiological receptor for  $\text{InsP}_3$ . Thus, whereas studies on the molecular structure and mechanism of the site of action of  $\text{InsP}_3$  are in their infancy, it is likely that much will come to light in the near future.

### Calcium release activated by guanine nucleotides

There have been a number of recent observations on a guanine-nucleotide-activated process that appears directly to activate profound and rapid movements of  $\text{Ca}^{2+}$  within many different types of cells. Below is a description of the effects of GTP on  $\text{Ca}^{2+}$  movements, their relationship to the actions of  $\text{InsP}_3$ , and the possible mechanism of activation of GTP-induced  $\text{Ca}^{2+}$  translocation. In this section we will consider the characteristics of the fluxes of  $\text{Ca}^{2+}$  activated by GTP.

#### *Identification of the GTP effect*

During some of the earlier experiments on the action of  $\text{InsP}_3$  in inducing  $\text{Ca}^{2+}$  release, permeabilized cell systems of several different types were found to be particularly useful for observing the effects of  $\text{InsP}_3$  (Streb, Irvine, Berridge & Schulz, 1983; Burgess *et al.* 1984). In contrast, isolated microsomal membrane fractions presented some problems in permitting observations on the effects of  $\text{InsP}_3$  (Dawson & Irvine, 1984). Such difficulties probably reflected either the lability of the  $\text{InsP}_3$ -activated release process under lengthy vesicle purification procedures, and/or a low yield of intact vesicles derived from the  $\text{InsP}_3$ -sensitive intracellular organelle. Dawson and his colleagues were approaching this problem using liver microsomes in which they had observed small effects of  $\text{InsP}_3$  (Dawson & Irvine, 1984). In attempting to augment this response, Dawson (1985) observed that GTP enhanced the effectiveness of  $\text{InsP}_3$ , and that this effect was promoted by polyethylene glycol. Undertaking similar experiments with microsomes isolated from cultured N1E-115 neuroblastoma cells, we observed a rather different response (Ueda, Chueh, Noel & Gill, 1986). With these microsomes, addition of  $\text{InsP}_3$  effected release of a small fraction (approximately 10 %) of releasable  $\text{Ca}^{2+}$ . When GTP and  $\text{InsP}_3$  were added simultaneously, a much larger release of  $\text{Ca}^{2+}$  was observed. However, in contrast to the results of Dawson, it was observed that GTP alone was highly effective in releasing  $\text{Ca}^{2+}$  (Ueda *et al.* 1986). The effect of GTP was rapid and profound, more than 50 % of total accumulated  $\text{Ca}^{2+}$  being released from the microsomal membrane vesicles within a few seconds. As described below, the nucleotide specificity and sensitivity of the GTP effect were remarkable. The high GTP-sensitivity was considered possible since during their isolation the microsomes had undergone considerable washing and hence were largely devoid of endogenous nucleotides. With this in mind, it was reasoned that the permeabilized cell preparations used extensively in prior  $\text{Ca}^{2+}$  flux analyses (Gill & Chueh, 1985), having been subjected to fewer washing procedures, would be a less suitable preparation on which to observe GTP-induced  $\text{Ca}^{2+}$  fluxes. However, this prediction was incorrect, and in fact the permeabilized cell preparations became the system of choice on which most of the characteristics of GTP-activated  $\text{Ca}^{2+}$  movements were determined. Using permeabilized N1E-115 neuroblastoma cells loaded with  $\text{Ca}^{2+}$  to equilibrium, the  $\text{EC}_{50}$  for GTP was observed to be below  $1\text{ }\mu\text{mol l}^{-1}$ , GTP releasing between 50 and 70 % of accumulated  $\text{Ca}^{2+}$  within 30 s (Fig. 1A). The effect GTP was observed to be

almost as rapid as that of the ionophore A23187, although the extent of release was not as complete, an observation that suggested heterogeneity of  $\text{Ca}^{2+}$ -accumulating compartments (see below).

*Nucleotide-sensitivity and nucleotide-specificity of calcium release*

The release of  $\text{Ca}^{2+}$  activated by guanine nucleotides observed using either permeabilized cells (Gill, Ueda, Chueh & Noel, 1986) or microsomes derived from cells (Ueda *et al.* 1986) has remarkably high sensitivity to GTP. The  $K_m$  for GTP measured in permeabilized N1E-115 cells is  $0.75 \mu\text{mol l}^{-1}$ . The effect also has very considerable nucleotide-specificity. Release was not observed with GMP, cyclic GMP, (either 2',3' or 3',5'), or with the nonhydrolysable analogues of GTP,  $\text{GTP}\gamma\text{S}$  or  $\text{GppNHp}$  (see Fig. 1). The latter is an important observation since it suggests a divergence in guanine nucleotide-specificity from that of the known G-proteins which are known to be much more effectively stimulated by nonhydrolysable GTP analogues. Other nucleoside triphosphates including ITP, UTP and CTP have no effect on  $\text{Ca}^{2+}$  movements, these nucleotides being largely ineffective even when added at concentrations up to  $1 \text{ mmol l}^{-1}$  (Gill *et al.* 1986). Submicromolar GTP concentrations function to release  $\text{Ca}^{2+}$  in the presence of millimolar ATP concentrations (required to maintain constant  $\text{Ca}^{2+}$  pumping activity), indicating the exceptional specificity of the GTP-activated release process. It was observed that GDP does induce  $\text{Ca}^{2+}$  release, but only after a significant lag of about 30 s (Fig. 1A); thereafter it releases  $\text{Ca}^{2+}$  to approximately the same extent as GTP. Results clearly indicate that this effect results from conversion of GDP to GTP *via* nucleoside diphosphokinase (NDPK) activity (Ueda *et al.* 1986; Gill *et al.* 1986). Thus, the effect of GDP is blocked by ADP (Fig. 1B) which effectively competes for the nucleoside diphosphate site on NDPK (Kimura & Shimada, 1983). In fact GDP itself does not induce  $\text{Ca}^{2+}$  release; thus,  $\text{GDP}\beta\text{S}$  (which is not easily phosphorylated to  $\text{GTP}\beta\text{S}$  by NDPK) has no effect on  $\text{Ca}^{2+}$  release (Fig. 1B). Moreover, not only is GDP without  $\text{Ca}^{2+}$ -releasing effects of its own, but it actually blocks the action of GTP, as shown in Fig. 1C; (note that, at  $100 \mu\text{mol l}^{-1}$ , GDP saturates NDPK activity and remains present for a longer period to compete with GTP). Further experimentation (in the presence of high [ADP] to prevent conversion of GDP to GTP) revealed that the inhibitory effect of GDP was competitive with respect to GTP with a  $K_i$  of approximately  $3 \mu\text{mol l}^{-1}$  (Gill *et al.* 1986);  $\text{GTP}\gamma\text{S}$  also blocks the effect of GTP, but rather surprisingly,  $\text{GppNHp}$  does not (Fig. 1C). This differential inhibitory action of the nonhydrolysable analogues has been a useful criterion for defining the specificity of the GTP-activated process and is referred to again later. The lack of direct action of  $\text{GTP}\gamma\text{S}$  and its inhibitory effect on the action of GTP are evidence that GTP hydrolysis is required for the activation of  $\text{Ca}^{2+}$  release. In fact, a very slow release activated by  $\text{GTP}\gamma\text{S}$  (Chueh & Gill, 1986) may be consistent with slow cleavage of the phosphorothioate residue which is known to occur (Eckstein, 1985). Further evidence for a GTP hydrolytic process being involved in activation of  $\text{Ca}^{2+}$  release derives from the competitive effect of GDP which indicates that either GTP or

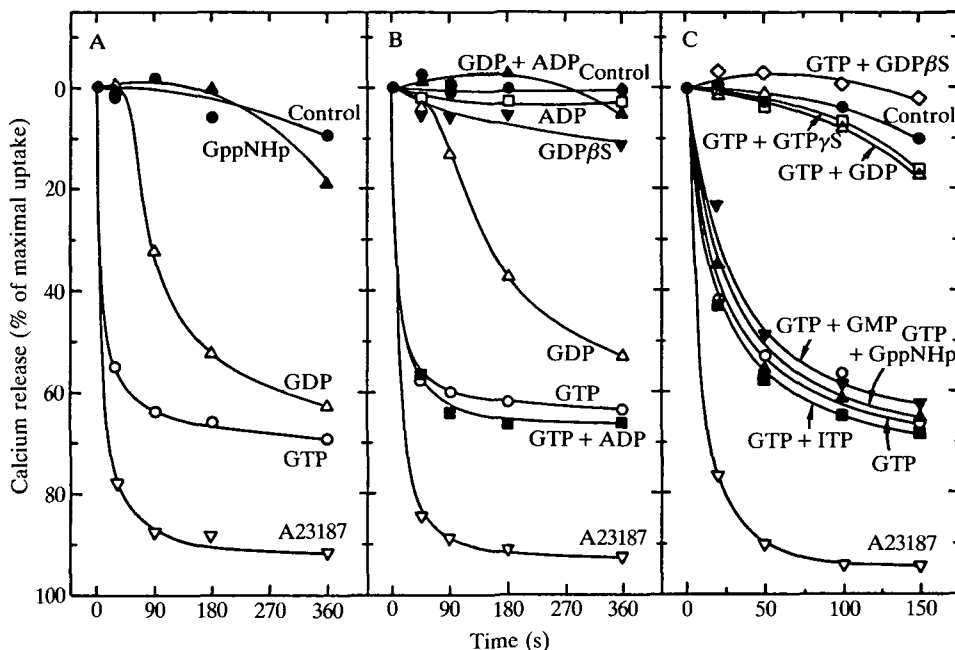

Fig. 1. Influence of different guanine nucleotides on the release of  $\text{Ca}^{2+}$  from permeabilized N1E-115 cells. Cells were loaded for 4 min with labelled  $\text{Ca}^{2+}$  under 'cytosolic-like' conditions ( $140 \text{ mmol l}^{-1}$  KCl,  $10 \text{ mmol l}^{-1}$  NaCl,  $2.5 \text{ mmol l}^{-1}$   $\text{MgCl}_2$ ,  $0.1 \mu\text{mol l}^{-1}$  free  $\text{Ca}^{2+}$ ,  $1 \text{ mmol l}^{-1}$  ATP, Hepes-KOH, pH 7.0) at which time the following additions were made: (A) control buffer (●),  $10 \mu\text{mol l}^{-1}$  GTP (○),  $20 \mu\text{mol l}^{-1}$  GppNHp (▲),  $20 \mu\text{mol l}^{-1}$  GDP (△), or  $5 \mu\text{mol l}^{-1}$  A23187 (▽); (B) control buffer (●),  $10 \mu\text{mol l}^{-1}$  GTP (○),  $10 \mu\text{mol l}^{-1}$  GDP (△),  $1 \text{ mmol l}^{-1}$  ADP (□),  $10 \mu\text{mol l}^{-1}$  GTP with  $1 \text{ mmol l}^{-1}$  ADP (■),  $10 \mu\text{mol l}^{-1}$  GDP with  $1 \text{ mmol l}^{-1}$  ADP (▲),  $10 \mu\text{mol l}^{-1}$  GDPβS (▼) or  $5 \mu\text{mol l}^{-1}$  A23187 (▽); (C) control buffer (●),  $3 \mu\text{mol l}^{-1}$  GTP (○),  $3 \mu\text{mol l}^{-1}$  GTP with  $100 \mu\text{mol l}^{-1}$  GppNHp (▲),  $3 \mu\text{mol l}^{-1}$  GTP with  $100 \mu\text{mol l}^{-1}$  GDP (△),  $3 \mu\text{mol l}^{-1}$  GTP with  $100 \mu\text{mol l}^{-1}$  GMP (▼),  $3 \mu\text{mol l}^{-1}$  GTP with  $100 \mu\text{mol l}^{-1}$  ITP (■),  $3 \mu\text{mol l}^{-1}$  GTP with  $100 \mu\text{mol l}^{-1}$  GTPγS (□),  $3 \mu\text{mol l}^{-1}$  GTP with  $100 \mu\text{mol l}^{-1}$  GDPβS (◇),  $5 \mu\text{mol l}^{-1}$  A23187 (▽). The addition of each of these agents or combinations of agents as shown were all made at zero-time. Release was terminated at the times shown by  $\text{La}^{3+}$ -quenching and rapid filtration to determine the amount of  $\text{Ca}^{2+}$  remaining in the permeabilized cells. See Gill, Ueda, Chueh & Noel (1986) and Gill & Chueh (1985) for details of the experimental conditions.

GDP can bind to the same site; presumably, the inhibitory effect of GDP arises through prevention of GDP dissociation after hydrolysis of GTP at the  $\text{Ca}^{2+}$  release-activating site.

#### *Specificity among cells and organelles*

Since in our early studies the observed effect of GTP on release of  $\text{Ca}^{2+}$  from the N1E-115 neuroblastoma cells was so profound, it was important to establish whether this effect was perhaps an anomaly restricted to this particular cell line

used. Using a quite unrelated cell type, the DDT<sub>1</sub>MF-2 smooth muscle cell line derived from hamster vas deferens (Norris, Gorski & Kohler, 1974), experiments suggested this was not the case. Thus, a sensitive, specific and substantial GTP-dependent release of Ca<sup>2+</sup> was observed using permeabilized DDT<sub>1</sub>MF-2 cells loaded with Ca<sup>2+</sup>, with pronounced effectiveness of as low as 0.1  $\mu\text{mol l}^{-1}$  GTP in the presence of 1  $\text{mmol l}^{-1}$  ATP (Chueh *et al.* 1987). In addition to the DDT<sub>1</sub>MF-2 cell line, we have measured almost identical effects of GTP on Ca<sup>2+</sup> release using permeabilized cells from the rat BC<sub>3</sub>H-1 smooth muscle cell line and from the human WI-38 normal embryonic lung fibroblast cell line. Using microsomal membrane vesicle fractions prepared from DDT<sub>1</sub>MF-2 cells by methods similar to those described for N1E-115 cell-derived microsomes (Ueda *et al.* 1986), we have observed GTP effects on Ca<sup>2+</sup> release almost identical to those seen with permeabilized cells. Furthermore, using microsomes derived from guinea pig parotid gland, Henne & Söling (1986) have observed very similar effects on release of accumulated Ca<sup>2+</sup> induced by GTP. The observations of Jean & Klee (1986) on GTP- and InsP<sub>3</sub>-mediated Ca<sup>2+</sup> release from microsomes derived from NG108-15 neuroblastoma X glioma hybrid cells are also consistent with our findings.

The GTP-induced Ca<sup>2+</sup> release process is specific to a nonmitochondrial Ca<sup>2+</sup>-sequestering organelle, which may be ER or a subfraction thereof (we frequently refer to it as being ER simply for convenience). Importantly, rather clear experiments demonstrate that no effects of guanine nucleotides or InsP<sub>3</sub> can be observed on Ca<sup>2+</sup> fluxes across mitochondrial or plasma membranes (Ueda *et al.* 1986; Chueh *et al.* 1987). The observation that less than 100 % of Ca<sup>2+</sup> release from ER is effected by GTP or InsP<sub>3</sub> suggests that only a subcompartment of ER contains the activatable efflux mechanisms. Although we have no direct proof that ER is a source of GTP-releasable Ca<sup>2+</sup>, interpretation of the effects of oxalate (described later), a known permeator of the ER membrane (Gill & Chueh, 1985), may indicate that ER is indeed a site of action of both GTP and InsP<sub>3</sub> (Chueh *et al.* 1987; Mullaney, Chueh, Ghosh & Gill, 1987; Mullaney, Yu, Ghosh & Gill, 1988). Moreover, we now know that GTP indeed modifies the movements of Ca<sup>2+</sup> associated with the InsP<sub>3</sub>-releasable Ca<sup>2+</sup> pool and hence that GTP and InsP<sub>3</sub> can act on the same Ca<sup>2+</sup> pool, as described below.

#### *GTP reversibly activates calcium release*

One of the most important areas of investigation concerns determination of the nature of the Ca<sup>2+</sup> translocation process activated by GTP. With regard to this mechanism, either of two distinct possibilities appeared likely: first, GTP could activate a channel process to permit the flow of Ca<sup>2+</sup> out of the organelle(s) into which Ca<sup>2+</sup> is sequestered; second, GTP could activate a fusion between organelle membranes resulting in the release or transfer of Ca<sup>2+</sup>. In the latter case, it would be very unlikely that such a process would be reversible, that is, that the two fused membranes could be returned to the unfused state with the same original enclosed volume. Recently, we reported that GDP at least partially reverses the primary effectiveness of GTP suggesting some degree of reversibility of the action of GTP

(Gill *et al.* 1986). Since then, a more definitive indication of the reversibility of the effect of GTP has come from a simpler study involving washing of cells after GTP-activation (Chueh *et al.* 1987). Thus, it has been observed that after activation of the GTP-dependent  $\text{Ca}^{2+}$  release process (with up to  $100\ \mu\text{mol l}^{-1}$  GTP), the effectiveness of GTP can be substantially (more than 70 %) reversed by simple washing of the GTP-treated permeabilized cells with GTP-free medium. In such experiments, cells that had been treated with GTP under conditions that activate  $\text{Ca}^{2+}$  release were thoroughly washed; after this treatment  $\text{Ca}^{2+}$  uptake proceeded to an extent approaching that of untreated cells, that is, the ability of ER to accumulate  $\text{Ca}^{2+}$  was largely restored. Moreover, such GTP-pretreated, washed cells responded again to a further application of GTP, indicating that the release process can be reactivated by GTP. It would be difficult to reconcile this reversibility with a membrane fusion process activated by GTP; in other words, the effects of a direct membrane fusion event would be unlikely to be reversed by washing and result in the restoration of almost normal  $\text{Ca}^{2+}$  retention, as observed. It should be noted, however, that structural and biophysical measurements undertaken by Dawson and coworkers suggest that fusion of membranes *can* follow GTP treatment of microsomal vesicles (Dawson, Hills & Comerford, 1987; Comerford & Dawson, 1988). At present this question is unresolved.

#### *Close membrane association promotes the action of GTP*

Electron microscopic analysis of membrane vesicles treated with GTP has suggested that the action of GTP, although not necessarily involving membrane fusion, may be promoted by close association between membranes. It is now well established that the effects of GTP on  $\text{Ca}^{2+}$  release are promoted by 1–3 % polyethylene glycol (PEG) (Chueh & Gill, 1986; Ueda *et al.* 1986; Gill *et al.* 1986). Thus, although in the absence of PEG, GTP induces a significant release of  $\text{Ca}^{2+}$ , this effect is substantially increased in the presence of PEG. The effect of PEG is to increase both the sensitivity to GTP and the maximal release induced by it. Although PEG is a known fusogen when present above 25 % w/v (Hui, Isac, Boni & Sen, 1985), we believe that the effect of PEG in enhancing  $\text{Ca}^{2+}$  release is unlikely to involve membrane fusion. Thus, our recent studies have analysed by electron microscopy the appearance of isolated microsomal membrane vesicles derived from N1E-115 cells after GTP-treatment with or without PEG (Chueh *et al.* 1987). We observed that GTP was without any effect on vesicle appearance, whereas 3 % PEG induced a very clear coalescence of vesicles into tightly associated conglomerates with very few free or unattached vesicles. The effect of PEG was not visibly altered by GTP. It may therefore be concluded that GTP itself does not induce any observable alteration in vesicle structure or association. However, the striking effectiveness of PEG is good evidence to suggest that the effect of GTP in inducing  $\text{Ca}^{2+}$  movements is promoted by a condition that clearly increases close associations between membranes. This may be an important clue to the action of GTP, as discussed in detail below. Thus, we consider that close association between membranes might be sufficient to permit the GTP-induced

event which could involve formation of some type of junctional process between membranes, perhaps permitting the flow of  $\text{Ca}^{2+}$ ; thereafter, it is possible that under certain conditions membrane fusion may occur.

### Relationship between $\text{InsP}_3$ - and GTP-activated calcium movements

#### *InsP<sub>3</sub> and GTP function via distinct mechanisms*

A further major problem to be addressed is the relationship between the actions of  $\text{InsP}_3$  and GTP, and whether the processes activated by each agent involve any common mechanism. As described in a recent report, a number of clear distinctions exist between the actions of  $\text{InsP}_3$  and GTP on  $\text{Ca}^{2+}$  release (Chueh & Gill, 1986). First,  $\text{InsP}_3$ -mediated release is unaffected by either GDP or  $\text{GTP}\gamma\text{S}$ , both of which block the action of GTP on  $\text{Ca}^{2+}$  release, as described above. Second, PEG, which considerably promotes GTP-activated release (as described above), does not alter the action of  $\text{InsP}_3$ ; indeed, the lack of effect of PEG on  $\text{InsP}_3$ -induced  $\text{Ca}^{2+}$  release suggests that  $\text{InsP}_3$  functions *via* a mechanism that does not require close membrane interactions. A third distinction between the actions of  $\text{InsP}_3$  and GTP is the temperature-dependency of their effects. Thus, the effect of  $\text{InsP}_3$  is remarkably insensitive to temperature changes, the rate of  $\text{InsP}_3$ -induced  $\text{Ca}^{2+}$  release being reduced by only 20 % when the temperature is decreased from 37°C to 4°C; this contrasts with the complete abolition of the effectiveness of GTP at the lower temperature (Chueh & Gill, 1986). The latter result is consistent with GTP activating release *via* a process involving an enzymic step, perhaps an enzymic hydrolysis of GTP, whereas the action of  $\text{InsP}_3$  is unlikely to involve an enzymic step. (As discussed above, this temperature-independence of the action of  $\text{InsP}_3$  is highly suggestive of a process involving direct activation of a channel.) A fourth major distinction between the actions of  $\text{InsP}_3$  and GTP concerns their  $\text{Ca}^{2+}$ -dependency. Thus,  $\text{InsP}_3$ -induced  $\text{Ca}^{2+}$  release, in contrast to that induced by GTP, is modified by the free  $\text{Ca}^{2+}$  concentration.  $\text{Ca}^{2+}$  uptake and release were normally measured at a free  $\text{Ca}^{2+}$  concentration of  $0.1 \mu\text{mol l}^{-1}$ . When the free  $\text{Ca}^{2+}$  concentration is increased to  $1 \mu\text{mol l}^{-1}$ , the effect of  $\text{InsP}_3$  is reduced by 50 %; at  $10 \mu\text{mol l}^{-1}$  free  $\text{Ca}^{2+}$  the action of  $\text{InsP}_3$  is completely abolished. In contrast, GTP induces identical fractional  $\text{Ca}^{2+}$  release over this entire range of free  $\text{Ca}^{2+}$  concentration.

The inhibition of  $\text{InsP}_3$ -mediated  $\text{Ca}^{2+}$  release with levels of  $\text{Ca}^{2+}$  above the physiological resting concentration ( $1 \mu\text{mol l}^{-1}$ ) is a significant observation indicating that the  $\text{InsP}_3$  release process is under negative feedback control from the level of  $\text{Ca}^{2+}$ , a potentially important regulatory response (Chueh & Gill, 1986). Interestingly, recent work from Worley *et al.* (1987) indicates that binding of labelled  $\text{InsP}_3$  to its putative membrane receptor has almost identical  $\text{Ca}^{2+}$ -sensitivity, suggesting that the feedback effect may exist at the  $\text{InsP}_3$  binding step. This also provides evidence that the  $\text{InsP}_3$  binding site identified by Worley *et al.* (1987) is the site of action of  $\text{InsP}_3$ . Much more compelling evidence to link the binding and action of  $\text{InsP}_3$  has recently arisen from analysis of the effects of the

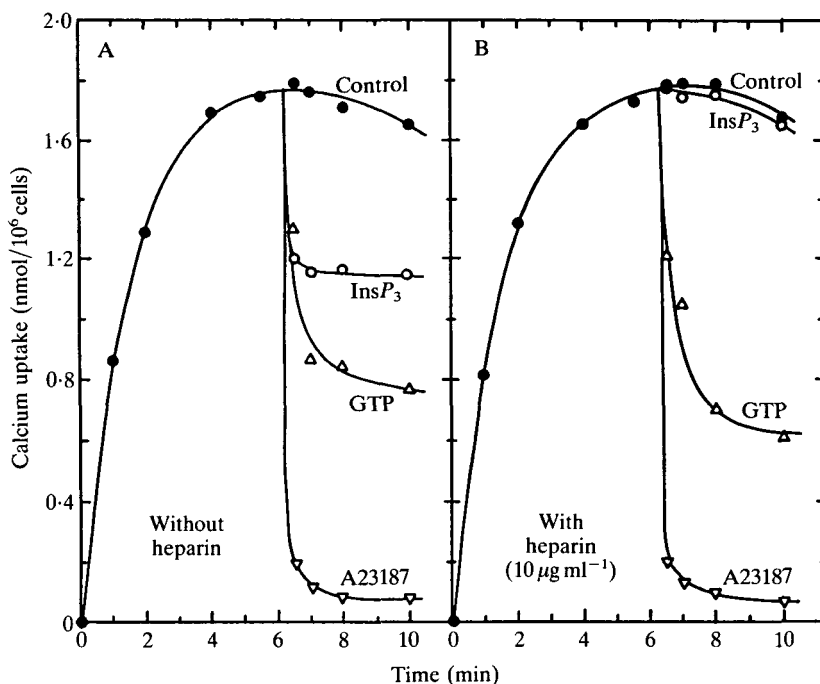

Fig. 2. Specificity of the blockade by heparin of  $\text{InsP}_3$ -activated  $\text{Ca}^{2+}$  release from permeabilized DDT<sub>1</sub>MF-2 smooth muscle cells. Permeabilized cells were incubated under standard conditions of ATP-dependent  $^{45}\text{Ca}^{2+}$  accumulation either in the presence (A) or absence (B) of heparin (4–6 kDa). After exactly 6 min of uptake, the following additions were:  $10\ \mu\text{mol l}^{-1}$   $\text{InsP}_3$  (○),  $10\ \mu\text{mol l}^{-1}$  GTP (Δ),  $5\ \mu\text{mol l}^{-1}$  A23187 (▽), or control buffer (●). At the indicated times, samples ( $100\ \mu\text{l}$ ) were withdrawn from vials and  $^{45}\text{Ca}^{2+}$  remaining within cells was determined after rapid  $\text{La}^{3+}$ -quenching and filtration as described in Fig. 1 and by Ghosh, Mullaney & Gill (1988).

glycosaminoglycan, heparin, which has been shown not only potently to inhibit  $\text{InsP}_3$  binding (Worley *et al.* 1987) but also to bind to and provide a high degree of purification of a specific  $\text{InsP}_3$ -binding protein, as recently described by Supattapone, Worley, Baraban & Snyder (1988). In very recent experiments we have observed that heparin is a powerful antagonist of the action of  $\text{InsP}_3$  in inducing  $\text{Ca}^{2+}$  release from either permeabilized cells or isolated membrane vesicles (Ghosh *et al.* 1988). Thus, heparin blocks  $\text{InsP}_3$ -induced  $\text{Ca}^{2+}$  release with a  $K_i$  of  $3\ \text{nmol l}^{-1}$ , suggesting a much higher affinity for the site than any known inositol phosphate. Moreover, heparin was shown to inhibit competitively the action of  $\text{InsP}_3$ , and also to reverse the  $\text{InsP}_3$ -activated  $\text{Ca}^{2+}$  release and permit immediate re-uptake of  $\text{Ca}^{2+}$ . As shown in Fig. 2, the effect of heparin was highly specific towards the action of  $\text{InsP}_3$ . Thus, heparin altered neither  $\text{Ca}^{2+}$  pumping activity nor the equilibrium uptake level (hence heparin did not alter any passive  $\text{Ca}^{2+}$  fluxes that contribute to the attainment of equilibrium). There was also no effect of

heparin on the releasability of  $\text{Ca}^{2+}$  in response to the ionophore A23187, indicating that heparin did not change the state of accumulated  $\text{Ca}^{2+}$ . Importantly, GTP-activated  $\text{Ca}^{2+}$  release was not affected by heparin. In other experiments, even heparin concentrations as high as  $100 \mu\text{g ml}^{-1}$  were without effect on the action of GTP. This is yet further convincing evidence for the distinction between the mechanisms of  $\text{Ca}^{2+}$  release activated by  $\text{InsP}_3$  and GTP. The reversible and competitive effect of heparin on the action of  $\text{InsP}_3$  indicates that when heparin displaces the  $\text{InsP}_3$  molecule from its site of action the release process is immediately terminated, suggesting that activation of the putative  $\text{InsP}_3$ -responsive  $\text{Ca}^{2+}$  channel is intimately related to occupation of the  $\text{InsP}_3$ -binding site. This conclusion supports the prior available evidence mentioned above suggesting direct channel activation by  $\text{InsP}_3$ , in contrast to the action of GTP which involves a quite distinct process.

Several of the distinctions between the actions of GTP and  $\text{InsP}_3$  (other than the effect of heparin) have also been reported by Henne & Söling (1986) using either liver- or parotid-derived microsomes, and by Jean & Klee (1986) using microsomes derived from NG108-15 neuroblastoma X glioma hybrid cells. It is concluded that the rapidity, relative temperature insensitivity and reversibility of  $\text{InsP}_3$ -induced  $\text{Ca}^{2+}$  release are all consistent with its probable direct activation of a  $\text{Ca}^{2+}$  channel, a conclusion in agreement with the observations of others (Muallem *et al.* 1985; Smith *et al.* 1985). In contrast, GTP appears to effect release by a temperature-sensitive process which probably involves the enzymic hydrolysis of the terminal phosphate from GTP.

#### *Compartments of calcium responsive to $\text{InsP}_3$ and GTP*

Both the  $\text{InsP}_3$ - and GTP-induced  $\text{Ca}^{2+}$  release processes function on a similar intracellular  $\text{Ca}^{2+}$ -sequestering compartment. Yet, the size of the releasable pools of  $\text{Ca}^{2+}$  are distinct. In the N1E-115 cell line, for example, the pool of  $\text{Ca}^{2+}$  released by GTP is approximately twice the size of the  $\text{InsP}_3$ -releasable pool, as shown in Fig. 3. Thus, using permeabilized N1E-115 cells, following maximal  $\text{Ca}^{2+}$  release by GTP,  $\text{InsP}_3$  is ineffective in releasing further  $\text{Ca}^{2+}$  (Fig. 3B); however, following maximal release by  $\text{InsP}_3$  (approximately 30 % of accumulated  $\text{Ca}^{2+}$ ), GTP does effect a further release of  $\text{Ca}^{2+}$  (Fig. 3A), in fact, down to the level GTP could induce when added alone (that is, approximately 60 % of accumulated  $\text{Ca}^{2+}$ ). These results suggest that three compartments exist; one sensitive to both GTP and  $\text{InsP}_3$ , another releasing  $\text{Ca}^{2+}$  only in response to GTP, and a third not releasing  $\text{Ca}^{2+}$  in response to either agent. Thus, it is apparent that although the GTP-releasable pool differs from the  $\text{InsP}_3$ -releasable pool in being larger, at least a significant proportion of accumulated  $\text{Ca}^{2+}$  lies within a pool which can be released by either of the two agents. In other words, it appears that all the  $\text{Ca}^{2+}$  within the  $\text{InsP}_3$ -sensitive  $\text{Ca}^{2+}$  pool is also releasable by the GTP-activated process, even if additional GTP-releasable  $\text{Ca}^{2+}$  also exists. This implies probable proximal relationship between the  $\text{InsP}_3$ - and GTP-activated  $\text{Ca}^{2+}$

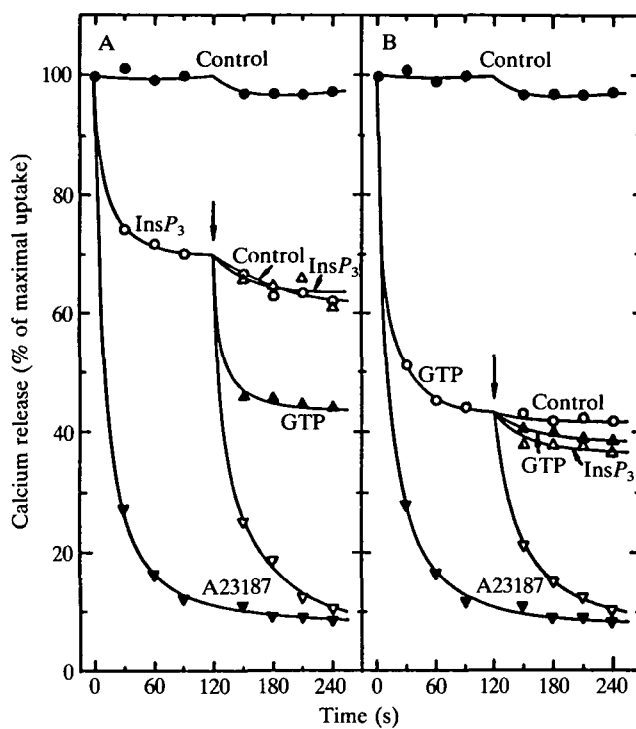

Fig. 3. Effects of sequential addition of  $\text{InsP}_3$  and GTP on  $\text{Ca}^{2+}$  release from permeabilized N1E-115 neuroblastoma cells.  $\text{Ca}^{2+}$  release was measured after loading for 5 min in the presence of  $0.1 \mu\text{mol l}^{-1}$  free  $\text{Ca}^{2+}$ , under the standard conditions (see Fig. 1). (A) Immediately following uptake, release was observed after addition of either  $10 \mu\text{mol l}^{-1}$   $\text{InsP}_3$  (○),  $5 \mu\text{mol l}^{-1}$  A23187 (▼) or control buffer (●); after 120 s of release in the presence of  $\text{InsP}_3$ , measurement of release was continued after further additions of either  $10 \mu\text{mol l}^{-1}$   $\text{InsP}_3$  (Δ),  $10 \mu\text{mol l}^{-1}$  GTP (▲),  $5 \mu\text{mol l}^{-1}$  A23187 (▼) or control buffer (○). (B) Immediately following uptake, release was observed after addition of either  $10 \mu\text{mol l}^{-1}$  GTP (○),  $5 \mu\text{mol l}^{-1}$  A23187 (▼) or control buffer (●); after 120 s of release in the presence of GTP, release was continued after further addition of either  $10 \mu\text{mol l}^{-1}$   $\text{InsP}_3$  (Δ),  $10 \mu\text{mol l}^{-1}$  GTP (▲),  $5 \mu\text{mol l}^{-1}$  A23187 (▼) or control buffer (○). In each case, samples of the  $\text{Ca}^{2+}$ -loaded permeabilized cell suspension were removed followed by rapid filtration and washing as described by Chueh *et al.* (1987).

release processes, and permits us to consider the existence of possible coupling events linking their modes of action.

#### GTP-activated calcium translocation: possible mechanism of action of GTP

Several parameters of the GTP-activated process have together suggested to us a model which may explain the translocation of  $\text{Ca}^{2+}$  which is observed. Before considering this model, another important result must be considered. We recently observed that GTP can induce an entirely opposite effect on  $\text{Ca}^{2+}$  movements in

the presence of oxalate; that is, GTP induces *uptake* as opposed to *release* of  $\text{Ca}^{2+}$  when oxalate is present. Although this observation at first appeared anomalous, it has provided an important piece of evidence in formulating our model for the action of GTP.

### *Calcium uptake activated by GTP*

#### *Effects of GTP in the presence of oxalate*

From the evidence described above, it was suggested that a simple GTP-mediated membrane fusion event was not entirely consistent with the observed release of  $\text{Ca}^{2+}$  induced by GTP. However, to investigate this problem experiments were designed to determine whether  $\text{Ca}^{2+}$  precipitated with oxalate could be released from within permeabilized cells upon application of GTP. As shown in our previous studies (Gill & Chueh, 1985) and established in many different cell types (Henkart *et al.* 1978; McGraw *et al.* 1980; Wakasugi *et al.* 1982; Burton & Laveri, 1985), the ER is permeable to anions including oxalate and phosphate which can diffuse into the ER lumen and hence promote a large increment in  $\text{Ca}^{2+}$  uptake due to formation of insoluble  $\text{Ca}^{2+}$ /oxalate or phosphate complexes. To investigate further how GTP activates  $\text{Ca}^{2+}$  release, we tested to see if oxalate-precipitated  $\text{Ca}^{2+}$  within ER could be released by GTP; a negative result would again militate against a simple membrane fusion event accounting for release and would instead argue in favour of a more selective channel mechanism, through which precipitated  $\text{Ca}^{2+}$  would not be expected to pass. However, as shown in Fig. 4, a marked *increase* in  $\text{Ca}^{2+}$  uptake was observed in the presence of oxalate, a remarkable and entirely opposite effect to that observed in the absence of oxalate. The effect is observed with concentrations of oxalate ( $2 \text{ mmol l}^{-1}$ ) that have very little effect on uptake of  $\text{Ca}^{2+}$  in the absence of GTP (Fig. 4C). When oxalate is present at a concentration inducing linear uptake of  $\text{Ca}^{2+}$  (Fig. 4E), GTP still activates an additional increase in the rate of uptake. This phenomenon is not restricted to particular cell types, thus an identical effect of GTP on  $\text{Ca}^{2+}$  uptake in the presence of oxalate was observed using either N1E-115 neuroblastoma or DDT<sub>1</sub>MF-2 smooth muscle cells.

#### *GTP activates calcium uptake and release by the same mechanism*

Considering the paradoxically opposite effects of GTP in the presence and absence of oxalate, it was important to establish whether the two actions of GTP are mediated *via* the same or different mechanisms. It is now clear from a large number of observations that a single GTP-activated mechanism mediates both effects (Mullaney *et al.* 1987). For example, the GTP-dependence of  $\text{Ca}^{2+}$  uptake induced in the presence of oxalate is almost identical to that of the release induced without oxalate. Thus, the  $K_m$  for GTP for  $\text{Ca}^{2+}$  uptake (with oxalate) is  $0.9 \mu\text{mol l}^{-1}$ , which is very close to the value of  $0.75 \mu\text{mol l}^{-1}$  derived from  $\text{Ca}^{2+}$  release data, as described above. Further studies have revealed that the uptake of

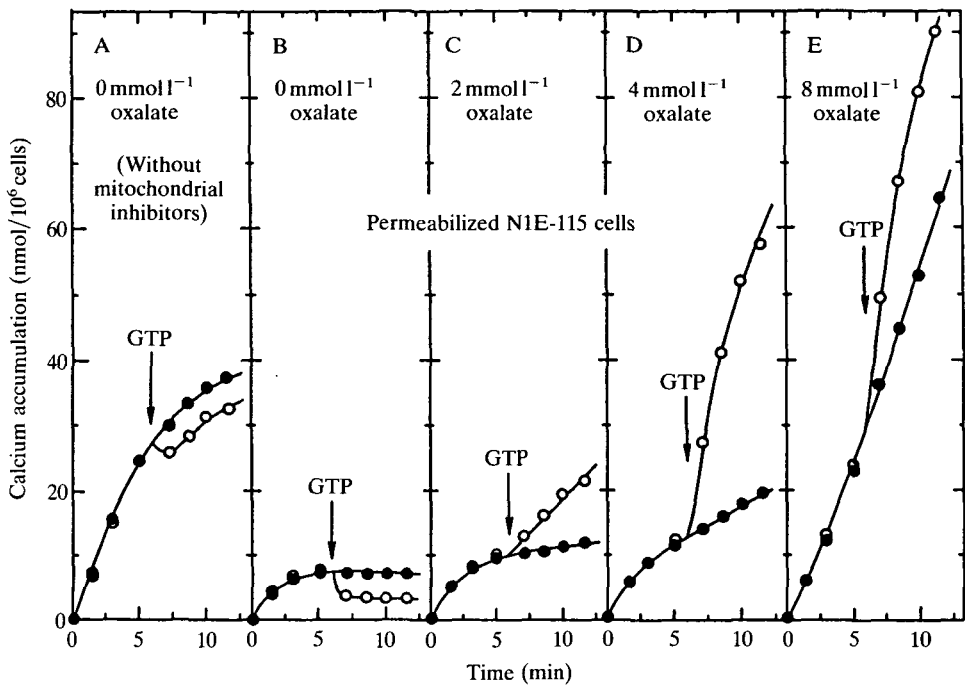

Fig. 4. GTP-activated movements of  $\text{Ca}^{2+}$  in permeabilized N1E-115 cells in the presence of increasing concentrations of oxalate. Experimental conditions were as described by Chueh *et al.* (1987) and Mullaney, Chueh, Ghosh & Gill (1987). These were essentially the same as in Fig. 1 with the exceptions that EGTA was absent and total  $\text{CaCl}_2$  was  $30 \mu\text{mol l}^{-1}$ . Experiments were undertaken either in the absence of mitochondrial inhibitors (A) or in the presence of  $5 \mu\text{mol l}^{-1}$  ruthenium red and  $10 \mu\text{mol l}^{-1}$  oligomycin (B–E). Potassium oxalate was either absent (A and B) or present from the beginning of uptake at a final concentration of 2 (C), 4 (D) or  $8 \text{ mmol l}^{-1}$  (E). After 6 min of uptake,  $10 \mu\text{mol l}^{-1}$  GTP (O) or control buffer (●) was added to the permeabilized cell suspensions. Samples from the incubation vials were taken at the times shown, and  $\text{Ca}^{2+}$  remaining within cells was determined by rapid  $\text{La}^{3+}$ -quenching and filtration as described by Chueh *et al.* (1987).

$\text{Ca}^{2+}$  induced by GTP in the presence of oxalate is promoted by PEG in a manner very similar to GTP-activated  $\text{Ca}^{2+}$  release without oxalate (Mullaney *et al.* 1987). Thus, although both GTP-activated release and uptake are observable in the absence of PEG, both effects are considerably augmented in the presence of 3 % PEG. In addition to these similarities between  $\text{Ca}^{2+}$  uptake and release induced by GTP, the nucleotide specificity profiles of the two processes closely coincide. A particularly important observation in this regard is that both effects of GTP show the same differential specificity towards the actions of nonhydrolysable GTP analogues, as shown in Fig. 5. Thus, GTP-activated  $\text{Ca}^{2+}$  uptake in the presence of oxalate is activated by neither  $\text{GTP}\gamma\text{S}$  (Fig. 5A) nor  $\text{GppNHp}$  (Fig. 5B). However, whereas  $100 \mu\text{mol l}^{-1}$   $\text{GTP}\gamma\text{S}$  almost completely blocks the action of

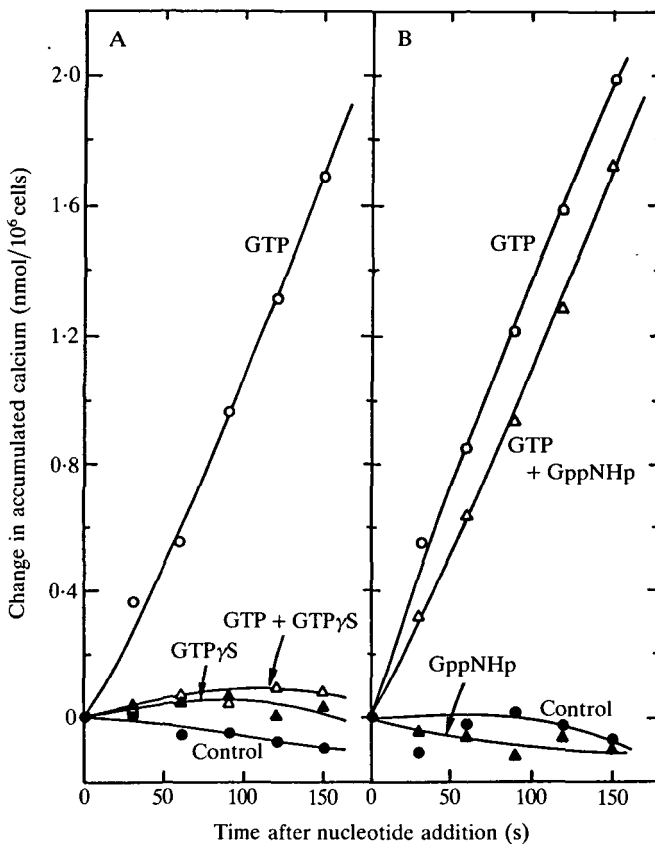

Fig. 5. Specificity of effects of nonhydrolysable analogues of GTP on  $\text{Ca}^{2+}$  uptake into permeabilized  $\text{DDT}_1\text{MF-2}$  cells. Uptake of  $\text{Ca}^{2+}$  was measured under the conditions described in Fig. 1, with  $10\ \mu\text{mol l}^{-1}$  oligomycin,  $4\ \text{mmol l}^{-1}$  potassium oxalate, and 3 % polyethylene glycol present throughout the incubations. Uptake of  $\text{Ca}^{2+}$  into cells was allowed to proceed for 7 min. At this time, each incubation vial received an addition of  $1\ \text{mmol l}^{-1}$  ADP (to prevent any subsequent conversion of GDP to GTP) together with the following: (A)  $5\ \mu\text{mol l}^{-1}$  GTP (○),  $10\ \mu\text{mol l}^{-1}$   $\text{GTP}\gamma\text{S}$  (▲),  $5\ \mu\text{mol l}^{-1}$  GTP together with  $100\ \mu\text{mol l}^{-1}$   $\text{GTP}\gamma\text{S}$  (△) or control buffer (●); (B)  $5\ \mu\text{mol l}^{-1}$  GTP (○),  $10\ \mu\text{mol l}^{-1}$   $\text{GppNHp}$  (▲),  $5\ \mu\text{mol l}^{-1}$  GTP together with  $100\ \mu\text{mol l}^{-1}$   $\text{GppNHp}$  (△) or control buffer (●). Uptake in the presence of these additions above that observed immediately prior to additions is plotted.  $\text{Ca}^{2+}$  accumulation within cells was determined by removing and rapidly filtering cells at the times indicated by procedures as described in Mullaney, Chueh, Ghosh & Gill (1987).

$5\ \mu\text{mol l}^{-1}$  GTP (Fig. 5A),  $\text{GppNHp}$  has almost no effect on the action of GTP (Fig. 5B). As mentioned above, it is assumed that the specificity between the two GTP analogues derives from the specificity of the nucleotide-binding site. The noneffectiveness of these analogues in promoting GTP-like effects is in clear distinction to the effects of guanine nucleotides on known G-protein activities

Table 1. Summary of parameters of GTP-activated calcium release and calcium uptake in the absence and presence of oxalate, respectively

| Parameter or condition                                                                          | Calcium release<br>(observed without<br>oxalate) | Calcium uptake<br>(observed with oxalate) |
|-------------------------------------------------------------------------------------------------|--------------------------------------------------|-------------------------------------------|
| $K_m$ for GTP                                                                                   | $0.75 \mu\text{mol l}^{-1}$                      | $0.9 \mu\text{mol l}^{-1}$                |
| $10 \mu\text{mol l}^{-1}$ GDP                                                                   | Delayed full effect                              | Delayed full effect                       |
| $10 \mu\text{mol l}^{-1}$ GDP (+1 mmol l <sup>-1</sup> ADP)                                     | No effect                                        | No effect                                 |
| $100 \mu\text{mol l}^{-1}$ GDP $\beta$ S                                                        | No effect                                        | No effect                                 |
| $10 \mu\text{mol l}^{-1}$ GTP + $100 \mu\text{mol l}^{-1}$ GDP<br>(+1 mmol l <sup>-1</sup> ADP) | GTP effect blocked                               | GTP effect blocked                        |
| $10 \mu\text{mol l}^{-1}$ GTP + $100 \mu\text{mol l}^{-1}$ GDP $\beta$ S                        | GTP effect blocked                               | GTP effect blocked                        |
| $10 \mu\text{mol l}^{-1}$ GTP $\gamma$ S                                                        | Slight effect                                    | Slight effect                             |
| $10 \mu\text{mol l}^{-1}$ GTP + $100 \mu\text{mol l}^{-1}$ GTP $\gamma$ S                       | GTP effect blocked                               | GTP effect blocked                        |
| $10 \mu\text{mol l}^{-1}$ GppNHp                                                                | No effect                                        | No effect                                 |
| $10 \mu\text{mol l}^{-1}$ GTP + $100 \mu\text{mol l}^{-1}$ GppNHp                               | GTP effect not blocked                           | GTP effect not blocked                    |
| 1–3 % PEG                                                                                       | Stimulated                                       | Stimulated                                |
| 1 mmol l <sup>-1</sup> vanadate                                                                 | No effect                                        | Blocked                                   |

Each of the parameters for GTP-activated  $\text{Ca}^{2+}$  uptake observed in the presence of oxalate refers to data presented by Chueh *et al.* (1987) and Mullaney, Chueh, Ghosh & Gill (1987). The observations relating to  $\text{Ca}^{2+}$  release (in the absence of oxalate) were published in prior reports (Ueda, Chueh, Noel & Gill, 1986; Gill, Ueda, Chueh & Noel, 1986; Chueh & Gill, 1986). Explanations and details of the conditions described are given in the text.

PEG, polyethylene glycol.

(such as those modulating adenylate cyclase) where nonhydrolysable analogues are maximally or supereffective. The similarity between the GTP-activated release and uptake processes is further exemplified by the effects of GDP on  $\text{Ca}^{2+}$  movements. Thus, GDP gives a full but delayed uptake response (Mullaney *et al.* 1987) which exactly coincides with its effect on release in the absence of oxalate (Gill *et al.* 1986; see Fig. 1). Moreover, as with release, GDP-mediated uptake is blocked by a high ( $1 \text{ mmol l}^{-1}$ ) ADP concentration, indicating that its action arises from conversion to GTP *via* nucleoside diphosphokinase activity; in the presence of ADP, GDP blocks the action of GTP. GDP $\beta$ S, which does not activate uptake, also blocks the action of GTP exactly as it does on GTP-induced  $\text{Ca}^{2+}$  release (see Fig. 1).

These data reveal almost complete correlation between parameters affecting GTP-activated uptake and release. A summary of these effects is given in Table 1. Such data provide very strong evidence suggesting that the same GTP-activated process mediates both uptake and release of  $\text{Ca}^{2+}$  in the presence and absence of oxalate, respectively. The only divergence between the two processes is the effectiveness of vanadate which blocks GTP-induced uptake but does not block GTP-activated release (Mullaney *et al.* 1987), indicating that GTP-activated uptake is dependent on the continuous action of the  $\text{Ca}^{2+}$  pump. However, as

discussed below, the proposed model for the actions of GTP accounts for this difference.

### *Indicators of the mechanism of action of GTP*

From the above data, a number of clues can be derived which together have suggested to us a model invoking a GTP-mediated conveyance of  $\text{Ca}^{2+}$  across membranes and perhaps between organelles. Before discussing this conclusion, let us summarize this new information. First, we have observed that a discrete pool of GTP-releasable  $\text{Ca}^{2+}$  exists in cells, a pool that may incorporate within it a smaller  $\text{InsP}_3$ -releasable  $\text{Ca}^{2+}$  pool; yet, despite the overlap between pools, we have provided substantial evidence suggesting distinctions between the mechanisms of GTP and  $\text{InsP}_3$  in *activating*  $\text{Ca}^{2+}$  release (Chueh & Gill, 1986). Second, since PEG promotes both the effects of GTP and a clearly observable membrane coalescence at the same concentration (1–3 %) (Chueh *et al.* 1987), it is probable that activation of  $\text{Ca}^{2+}$  movements within cells is related to the occurrence of close appositions between membranes. Third, although direct fusion between membranes could account for some of the effects of GTP on  $\text{Ca}^{2+}$  movements, the observed reversibility of the effects of GTP together with the nonreleasability of oxalate-complexed  $\text{Ca}^{2+}$  by GTP would argue against a simple GTP-mediated fusion event between membrane surfaces as being the direct cause of  $\text{Ca}^{2+}$  movements. Fourth, there seems little doubt that the process of GTP-activated  $\text{Ca}^{2+}$  uptake in the presence of oxalate occurs *via* the same mechanism by which GTP activates release of  $\text{Ca}^{2+}$ , in spite of the apparent opposite nature of these two GTP-mediated events.

This last piece of information appeared the most perplexing, yet ironically it may provide the most significant clue to the action of GTP. Thus, it is likely that oxalate promotes the uptake of  $\text{Ca}^{2+}$  into a discrete  $\text{Ca}^{2+}$ -accumulating pool. As described above, it is well known that the ER membrane is permeable to anions including oxalate and phosphate. Hence passive entry of oxalate permits the formation of clearly observable insoluble complexes within the lumen of ER in cells; the entry of such anions may be mediated *via* a nonselective anion transporter activity analogous to that functioning in the SR membrane of muscle (see Martonosi, 1982). It is also apparent from our previous studies that, whereas  $\text{Ca}^{2+}$  accumulation in permeabilized cells and isolated microsomal membrane vesicles is oxalate-promoted, the accumulation of  $\text{Ca}^{2+}$  within purified inverted plasma membrane vesicles *via* the high-affinity plasma membrane  $\text{Ca}^{2+}$  pump is not enhanced by oxalate (Gill & Chueh, 1985). Since we have shown that these plasma membrane vesicles can indeed accumulate high intravesicular  $\text{Ca}^{2+}$  concentrations (Gill, Grollman & Kohn, 1981; Gill, 1982*b*; Gill, Chueh & Whitlow, 1984), more than sufficient to be precipitated in the presence of millimolar oxalate concentrations, we conclude that such membranes are largely impermeable to oxalate or phosphate. Thus, there is a good precedent for the existence of membranes through which passage of anions such as oxalate does not

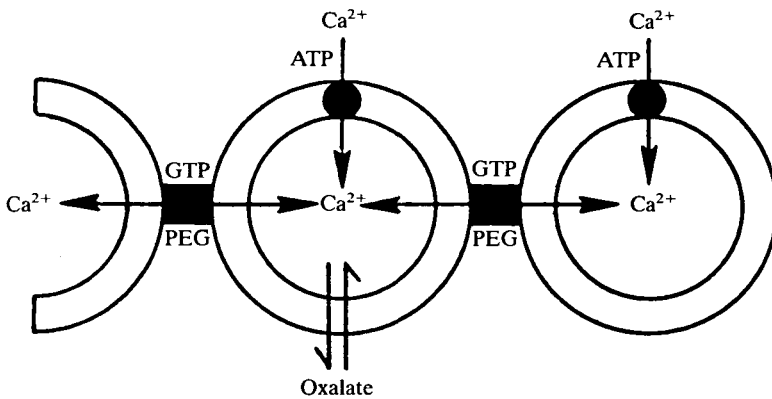

Fig. 6. Hypothetical model explaining the two effects of GTP on  $\text{Ca}^{2+}$  movements in cells, that is, GTP-mediated  $\text{Ca}^{2+}$  release and GTP-mediated  $\text{Ca}^{2+}$  uptake in the absence and presence of oxalate, respectively. Details of the evidence and an explanation of the proposed 'conveyance' of  $\text{Ca}^{2+}$  between open and closed compartments via a transmembrane  $\text{Ca}^{2+}$  translocation process are given in the text and in Chueh *et al.* (1987) and Mullaney, Chueh, Ghosh & Gill (1987). PEG, polyethylene glycol.

occur, and that organelle membranes may perhaps be distinguished according to their permeability to oxalate.

#### *Model for GTP-activated transmembrane calcium 'conveyance'*

With the knowledge that distinct membranes exist which are differentially permeable to oxalate, we propose that in the presence of oxalate, GTP promotes uptake of  $\text{Ca}^{2+}$  as the result of a GTP-mediated movement of  $\text{Ca}^{2+}$  from a nonoxalate-permeable pool, which actively pumps  $\text{Ca}^{2+}$ , to another  $\text{Ca}^{2+}$ -pumping pool which is freely permeable to oxalate. Thus, it is envisaged that GTP promotes a transmembrane conveyance of  $\text{Ca}^{2+}$  between such pools by activating some type of junctional process between the two membranes (see Fig. 6). Alternative schemes involving GTP-promoted oxalate-permeability or enhanced  $\text{Ca}^{2+}$  pumping are possible; but why then should an almost identical GTP-dependent process mediate movement (release) of  $\text{Ca}^{2+}$  in the absence of oxalate? In the model depicted in Fig. 6, the oxalate-permeable pool is very likely to be the ER or a subcompartment thereof; the nature of the putative nonoxalate-permeable pool is uncertain. Although the plasma membrane has been rendered permeable in our studies, it is possible that separate enclosed membranes derived from the plasma membrane might exist within the cell; such autonomous vesicles would be largely protected from the permeabilizing effects of saponin. The postulated process of junction formation between membranes would obviously be promoted by conditions that favour close appositions between membranes, as occurs in the presence of PEG. The action of GTP is envisaged as a necessary factor in either inducing the formation of junctions or activating the movement of  $\text{Ca}^{2+}$  through junctional processes arising by either random or PEG-promoted

membrane interactions. Such transfer of  $\text{Ca}^{2+}$  would be activated by terminal phosphate hydrolysis from GTP; when GTP is washed away, the continued operation of such transfer would be terminated, as indicated by the reversibility experiments described above (Chueh *et al.* 1987).

An obvious problem is how GTP-mediated  $\text{Ca}^{2+}$  release could be accounted for by the same model. It seems entirely possible that the same type of junctional connections could be formed between intact organelles such as ER and nonclosed membranes, perhaps the plasma membrane. In this case, transmembrane conveyance of  $\text{Ca}^{2+}$  would result in release of  $\text{Ca}^{2+}$  to the medium (see Fig. 6). If such a conveyance of  $\text{Ca}^{2+}$  to the outside could be mediated by GTP how could GTP induce a build-up of  $\text{Ca}^{2+}$  within the oxalate-permeable pool? If the hypothetical GTP-activated junctional processes transmit only small solutes between pools (as gap junctions between cells are known to do), then a precipitate of the  $\text{Ca}^{2+}$ -oxalate complex would not be expected to be transferred. Thus, in the experiments described above, oxalate and  $\text{Ca}^{2+}$  have been permitted to equilibrate within the oxalate-permeable pool; addition of GTP may result in a substantial 'injection' of  $\text{Ca}^{2+}$  from a nonoxalate-permeable (but, nevertheless,  $\text{Ca}^{2+}$ -pumping) pool; this  $\text{Ca}^{2+}$  would be immediately precipitated owing to the excess oxalate present. When GTP and oxalate are added simultaneously at the beginning of uptake, GTP causes a prolonged inhibition of  $\text{Ca}^{2+}$  uptake due to activation of the release process. With time and in the presence of sufficient oxalate, there is a gradual increase in uptake followed eventually by a sustained uptake which proceeds at a rate approaching the maximal rate of uptake observed when GTP is added after oxalate (see below). The initial phase of this type of response is presumably due to the continued release of  $\text{Ca}^{2+}$  to the exterior, thus preventing sufficient build-up of  $\text{Ca}^{2+}$  to that critical level at which precipitation with oxalate occurs. Irrespective of when oxalate is added, the  $\text{Ca}^{2+}$ -conveyance model predicts that  $\text{Ca}^{2+}$ -pumping activity is essential to sustain GTP-activated  $\text{Ca}^{2+}$  uptake in the presence of oxalate, a prediction clearly confirmed by the blocking action of vanadate.

A significant problem that has dominated the physiological implications of the GTP-activated  $\text{Ca}^{2+}$  movements we have described, is how the high levels of GTP within cells ( $0.1\text{--}0.3\text{ mmol l}^{-1}$ ) can be reconciled with the extreme sensitivity of the GTP-activated process; thus, it was argued that under physiological conditions, the intracellular pool acted upon by GTP would be permanently depleted (Baker, 1986). However, by implicating a transfer of  $\text{Ca}^{2+}$  only between actively pumping organelles (and possibly with the outside of the cell), there would not be any collapse of existing gradients. Thus, the release that is observed with GTP may only reflect an artificially imposed, diminished external  $\text{Ca}^{2+}$  level that is a consequence of using permeabilized cells. In other words, such release could actually represent reversed movement of  $\text{Ca}^{2+}$  through a system that normally exists to convey  $\text{Ca}^{2+}$  perhaps to replenish the intracellular pool. The implication here is that such interpool communication may normally exist between organelles in intact cells but be reversed when cells are broken and GTP washed away.

Alternatively, the functioning of such  $\text{Ca}^{2+}$ -communication between organelles may be regulated *in situ* by another cytosolic factor.

*GTP-induced loading in the  $\text{InsP}_3$ -releasable calcium pool*

With the above model in mind, perhaps the most relevant problem to be addressed was the relationship between the pools of  $\text{Ca}^{2+}$  modified by GTP and that  $\text{Ca}^{2+}$  pool sensitive to  $\text{InsP}_3$ . This area of investigation has produced some important results. One initial step was to ascertain whether  $\text{InsP}_3$  releases  $\text{Ca}^{2+}$  from an oxalate-permeable or oxalate-impermeable pool. This question is largely answered by the data shown in Fig. 7. In permeabilized cells from the DDT<sub>1</sub>MF-2 smooth muscle and the N1E-115 neuroblastoma cell lines,  $\text{InsP}_3$  in the absence of oxalate reduces  $\text{Ca}^{2+}$  uptake by 50 and 30 %, respectively (Fig. 7A,C), effects entirely consistent with the extent of  $\text{Ca}^{2+}$  release observed following  $\text{InsP}_3$  addition to  $\text{Ca}^{2+}$ -loaded cells, as described above. In the presence of oxalate a sustained increase in the rate of ATP-dependent  $\text{Ca}^{2+}$  accumulation is observed (Fig. 7B,D) consistent with formation of the insoluble  $\text{Ca}^{2+}$ /oxalate complex and hence a reduced rate of  $\text{Ca}^{2+}$  efflux (Gill & Chueh, 1985; Mullaney *et al.* 1987). Importantly,  $10\ \mu\text{mol l}^{-1}$   $\text{InsP}_3$  (a maximally effective concentration) completely eliminates the increment in  $\text{Ca}^{2+}$  uptake induced by oxalate in permeabilized DDT<sub>1</sub>MF-2 cells (Fig. 7B) indicating that  $\text{InsP}_3$  activates  $\text{Ca}^{2+}$  release from an oxalate-permeable pool. Although not completely abolishing oxalate-enhanced  $\text{Ca}^{2+}$  uptake, the effectiveness of  $\text{InsP}_3$  is very similar using permeabilized N1E-115 cells (Fig. 7D); hence in these cells, whereas  $\text{InsP}_3$  does release  $\text{Ca}^{2+}$  from an oxalate-permeable pool, a small fraction of this pool may be unresponsive to  $\text{InsP}_3$ . As stated above, it is well established that the ER membrane is permeable to anions including oxalate, hence permitting clearly observable precipitation of  $\text{Ca}^{2+}$  within the ER lumen when oxalate is presented intracellularly. Thus, these data, although not providing definitive proof, are consistent with the view that the source of  $\text{InsP}_3$ -mobilizable  $\text{Ca}^{2+}$  is the ER or at least a subcompartment thereof.

Although, as described above, there are clear distinctions between the mechanisms by which  $\text{InsP}_3$  and GTP activate  $\text{Ca}^{2+}$  movements, the data shown in Fig. 8 clearly establish a link between the actions of the two effectors. When added from the start of uptake, GTP and  $\text{InsP}_3$  inhibit the accumulation of  $\text{Ca}^{2+}$  in a nonadditive manner (Fig. 8A) consistent with the extent of release described above. In the presence of oxalate, the action of GTP is very different from that of  $\text{InsP}_3$  (Fig. 8B). Thus, whereas  $\text{InsP}_3$  merely inhibits accumulation, GTP shows a biphasic effect. This effect of GTP is interpreted to support further the model in Fig. 6 since it shows that the two opposing GTP-activated movements of  $\text{Ca}^{2+}$  directly compete for access of  $\text{Ca}^{2+}$  to a common compartment. Thus, although initially  $\text{Ca}^{2+}$  release occurs resulting from interactions between closed and open compartments, thereafter, as the threshold of accumulated  $\text{Ca}^{2+}$  reaches that precipitable by oxalate, release of complexed  $\text{Ca}^{2+}$  is prevented and  $\text{Ca}^{2+}$  continues to accumulate at a higher rate reflecting the combined pumping activity of intact pools between which  $\text{Ca}^{2+}$  movement has been activated by GTP. Most

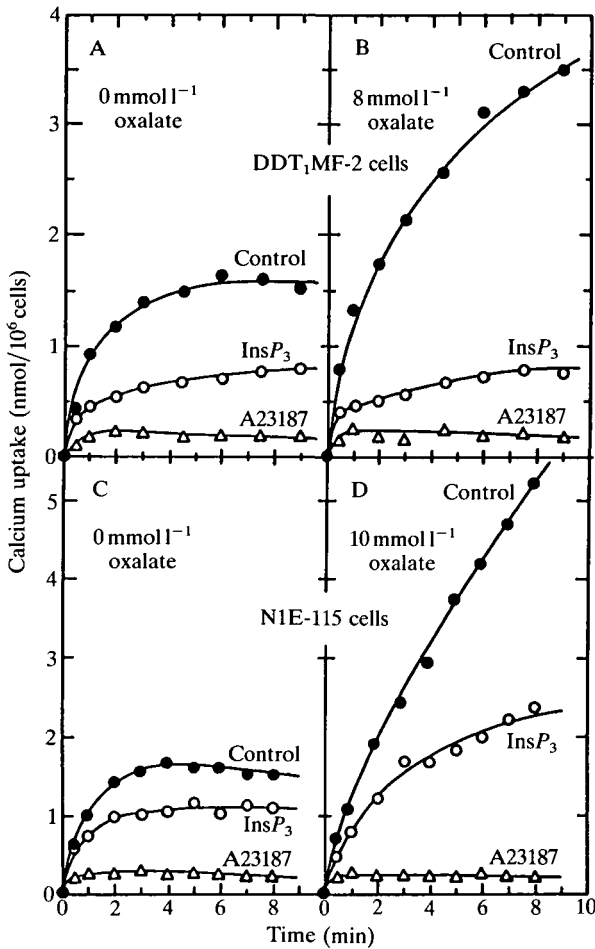

Fig. 7. InsP<sub>3</sub>-mediated inhibition of oxalate-dependent Ca<sup>2+</sup> uptake into permeabilized DDT<sub>1</sub>MF-2 smooth muscle cells (A,B) or N1E-115 neuroblastoma cells (C,D). Uptake of Ca<sup>2+</sup> was started at time zero by addition of ATP and labelled Ca<sup>2+</sup> to gently stirred cells in uptake medium and was terminated by rapid filtration of samples of cells removed at the indicated times, as described for Fig. 1. Oxalate was either absent from the uptake medium (A,C) or was present from the start of uptake at either 8 (B) or 10 mmol l<sup>-1</sup> (D). Uptake was measured either under standard conditions (●) or in the presence of 10 μmol l<sup>-1</sup> InsP<sub>3</sub> (○) or 5 μmol l<sup>-1</sup> A23187 (△) added to incubation vials in each case at time zero. The medium contained 50 μmol l<sup>-1</sup> CaCl<sub>2</sub> buffered to 0.1 μmol l<sup>-1</sup> free Ca<sup>2+</sup> with EGTA; further experimental details are given in Mullaney, Chueh, Ghosh & Gill (1988).

importantly, the GTP-induced enhanced Ca<sup>2+</sup> uptake phase is almost completely abolished when InsP<sub>3</sub> is added together with GTP (Fig. 8B) indicating that InsP<sub>3</sub> releases Ca<sup>2+</sup> from the same pool into which GTP activates Ca<sup>2+</sup> accumulation. These results obtained using permeabilized N1E-115 neuroblastoma cells have been repeated using permeabilized DDT<sub>1</sub>MF-2 smooth muscle cells. It should be

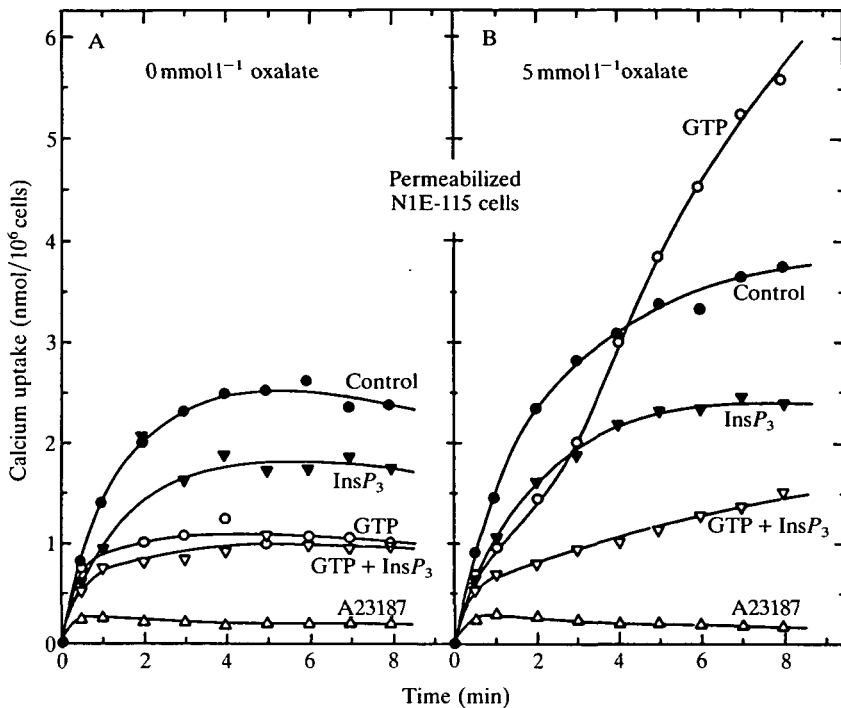

Fig. 8.  $\text{InsP}_3$ -induced reversal of the GTP-activated  $\text{Ca}^{2+}$  uptake phase in permeabilized N1E-115 neuroblastoma cells. ATP-dependent uptake of  $\text{Ca}^{2+}$  was measured at the indicated times after addition of ATP and labelled  $\text{Ca}^{2+}$  to cells as described in Fig. 7 (see Mullaney, Yu, Ghosh & Gill, 1988). Incubations were conducted either in the absence of oxalate (A) or in the presence of  $5 \text{ mmol l}^{-1}$  oxalate (B). Uptake proceeded under otherwise standard conditions (●), or after addition of either  $10 \mu\text{mol l}^{-1}$  GTP (○),  $10 \mu\text{mol l}^{-1}$   $\text{InsP}_3$  (▼),  $10 \mu\text{mol l}^{-1}$  GTP together with  $10 \mu\text{mol l}^{-1}$   $\text{InsP}_3$  (▽) or  $5 \mu\text{mol l}^{-1}$  A23187 (△). Additions of oxalate,  $\text{InsP}_3$ , GTP and A23187 were all made at time zero.

noted that  $\text{InsP}_3$  does not block the effects of GTP *per se*, since  $\text{Ca}^{2+}$  accumulation is reduced to a level well below that induced by  $\text{InsP}_3$ ; thus, it may be inferred that although  $\text{InsP}_3$  prevents the additional accumulation of  $\text{Ca}^{2+}$  activated by GTP, it in fact permits the  $\text{Ca}^{2+}$ -releasing effects of GTP to dominate. These results provide direct evidence for the operation of both GTP- and  $\text{InsP}_3$ -activatable  $\text{Ca}^{2+}$  transport mechanisms on the same pool of  $\text{Ca}^{2+}$ . Most significantly, they suggest that loading of  $\text{Ca}^{2+}$  within the  $\text{InsP}_3$ -sensitive pool may be controlled by the GTP-activated  $\text{Ca}^{2+}$  translocation process.

### Conclusions and scheme for the actions of $\text{InsP}_3$ and GTP

The proposed scheme of GTP-activated  $\text{Ca}^{2+}$  movements accounts for all the observed effects of GTP and oxalate on  $\text{Ca}^{2+}$  movements. Alternative schemes invoking direct effects of GTP on  $\text{Ca}^{2+}$  pumping or GTP-enhanced movements of

oxalate are inherently unlikely since they do not account for rapid GTP-mediated  $\text{Ca}^{2+}$  release. In fact, GTP-mediated  $\text{Ca}^{2+}$  release occurs in the presence of vanadate and in the absence of ATP (Mullaney *et al.* 1987), that is, in the absence of any pumping activity. Also, in a recent report, Hamachi *et al.* (1987) described similar GTP-enhanced uptake of  $\text{Ca}^{2+}$  in the presence of oxalate. Although no explanation was offered for the effect, direct experiments revealed no effect of GTP on oxalate movements. Although recent work from Dawson and colleagues (Dawson *et al.* 1987; Comerford & Dawson, 1988) suggests membrane fusion may account for the effects of GTP, as stated above, the observations we have made on reversibility of the effects of GTP and on the electron microscopic structure of microsomal membrane vesicles treated with GTP, together argue against a simple membrane fusion process being activated by GTP. Although GTP hydrolysis is clearly implicated in the process of GTP-activated  $\text{Ca}^{2+}$  translocation (Chueh & Gill, 1986; Gill *et al.* 1986), it is presently unclear whether terminal phosphate is transferred to water (as in the case of a GTPase reaction), or whether a kinase-mediated mechanism transfers phosphate to another substrate molecule. Evidence for the former was recently presented by Nicchitta, Joseph & Williamson (1986), whereas a GTP-induced protein phosphorylation possibly associated with  $\text{Ca}^{2+}$  release was claimed by Dawson, Comerford & Fulton (1986).

Based on several important conclusions drawn from the data given in Figs 7 and 8, the scheme described above to account for the effects of GTP can be extended to encompass the action of  $\text{InsP}_3$ . First, from the data in Fig. 8A and data described earlier, it is apparent that the  $\text{InsP}_3$ -releasable  $\text{Ca}^{2+}$  pool is both smaller than and contained within the GTP-activatable pool. Second, based on the results shown in Fig. 7, the pool from which  $\text{InsP}_3$  induces  $\text{Ca}^{2+}$  release is itself permeable to oxalate. Third, and most significant, this  $\text{InsP}_3$ -releasable  $\text{Ca}^{2+}$  pool is indeed the same pool that can be loaded with  $\text{Ca}^{2+}$  via the GTP-induced  $\text{Ca}^{2+}$ -translocating process, as shown in Fig. 8B. These observations suggest to us that the  $\text{InsP}_3$ -releasable  $\text{Ca}^{2+}$  pool is the oxalate-permeable subcompartment of the GTP-activatable pool, as depicted in the model shown in Fig. 9. Thus, we assume that the efficient operation of the  $\text{InsP}_3$ -activated  $\text{Ca}^{2+}$  channel enhances efflux of  $\text{Ca}^{2+}$  from this pool effectively enough to prevent sufficient build-up of  $\text{Ca}^{2+}$  to reach the oxalate-precipitable threshold. Interestingly, when the experiment shown in Fig. 8B is conducted with  $10 \text{ mmol l}^{-1}$  oxalate or higher (data not shown), some GTP-dependent build-up of  $\text{Ca}^{2+}$  does occur at later times in the presence of  $\text{InsP}_3$ , suggesting that by lowering the oxalate threshold, even the rapid release effected by  $\text{InsP}_3$  is insufficient to prevent a significant build-up of  $\text{Ca}^{2+}$ .

The direct reversal of the effect of GTP by  $\text{InsP}_3$  provides a strong argument for considering that indeed both  $\text{InsP}_3$  and GTP can act upon a common pool of  $\text{Ca}^{2+}$ . Such conclusions are reminiscent of our earlier 'flux reversal' studies which provided direct proof for the coexistence of specific plasma membrane  $\text{Ca}^{2+}$  and  $\text{Na}^+$  flux mechanisms in a single population of synaptic membrane vesicles (Gill *et al.* 1981; Gill, 1982*a,b*). The most significant implication of the scheme shown in

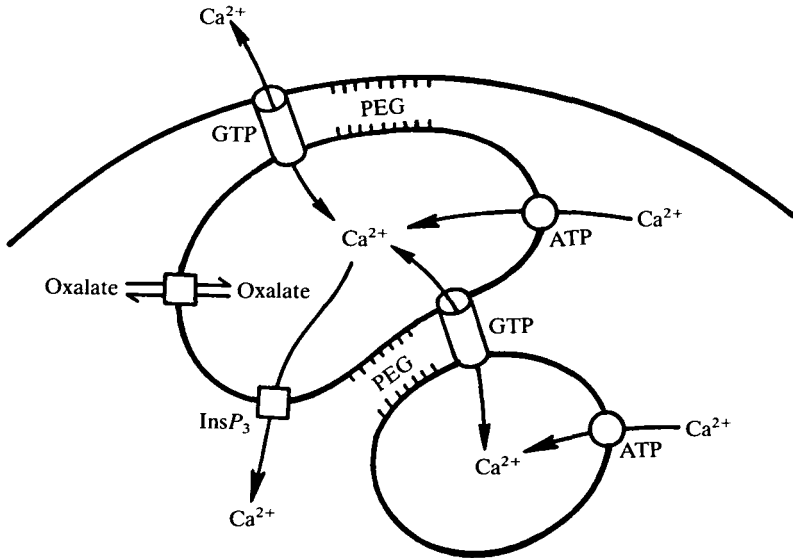

Fig. 9. Proposed scheme for the movements of  $\text{Ca}^{2+}$  induced by GTP and  $\text{InsP}_3$ . The model proposes that separate ATP-dependent  $\text{Ca}^{2+}$ -pumping compartments exist which are distinct with respect to both  $\text{InsP}_3$ -releasability and oxalate permeability, and that GTP mediates  $\text{Ca}^{2+}$  translocation between such compartments, perhaps *via* activation of intermembrane junctional processes. It is further proposed that GTP-activated  $\text{Ca}^{2+}$  release occurs *via* the same mechanism except involving interactions between the surfaces of closed and nonclosed membranes. As described previously (Chueh & Gill, 1986; Ueda, Chueh, Noel & Gill, 1986; Gill, Ueda, Chueh & Noel, 1986; Chueh *et al.* 1987; Mullaney, Chueh, Ghosh & Gill, 1987), the effects of GTP on both uptake and release of  $\text{Ca}^{2+}$  are promoted by low concentrations of polyethylene glycol (PEG) (1–3 %) which also promote the formation of close appositions between membrane surfaces (Chueh *et al.* 1987). However, PEG is not essential and the same GTP-activated  $\text{Ca}^{2+}$  movements are still observable in its absence (Chueh & Gill, 1986; Mullaney *et al.* 1987). Details of the evidence indicating the site of action of  $\text{InsP}_3$  and the proposed mechanism of GTP in this scheme are described in the text and in Chueh *et al.* (1987); Mullaney *et al.* (1987); Mullaney, Yu, Ghosh & Gill (1988).

Fig. 9 is that a close interrelationship probably exists between the actions of  $\text{InsP}_3$  and GTP. We had previously speculated that this might be the case (Mullaney *et al.* 1987) but had no proof. The data presented in Figs 7 and 8 provide for the first time direct evidence that both  $\text{InsP}_3$  and GTP can modify the same  $\text{Ca}^{2+}$  compartment in spite of their probable distinct mechanisms of action.

It is very possible that the GTP-regulated  $\text{Ca}^{2+}$ -translocating process may control the size of the  $\text{InsP}_3$ -induced  $\text{Ca}^{2+}$  signal by permitting  $\text{InsP}_3$  to release  $\text{Ca}^{2+}$  from a more extensive internal  $\text{Ca}^{2+}$  pool. Moreover, the same process may regulate the loading and/or replenishment of  $\text{Ca}^{2+}$  within the  $\text{InsP}_3$ -releasable pool. Such potential regulation derives much relevance from the considerable attention that has been directed towards the possible mechanisms by which the  $\text{InsP}_3$ -releasable  $\text{Ca}^{2+}$  pool may be replenished from the outside. Thus, Putney

(1986) has suggested that external  $\text{Ca}^{2+}$  entry may be directed into this pool and hence account for the frequently observed prolonged responses to receptor-induced signals which are dependent on extracellular  $\text{Ca}^{2+}$ . Recently, Irvine & Moor (1986, 1987) have presented experimental evidence suggesting the possible involvement of inositol 1,3,4,5-tetrakisphosphate ( $\text{InsP}_4$ ) in inducing  $\text{Ca}^{2+}$  entry; in fact, their studies on activation of sea urchin eggs are consistent with the possibility that  $\text{InsP}_4$  may promote entry of external  $\text{Ca}^{2+}$  into the  $\text{InsP}_3$ -releasable pool *via* a mechanism remarkably similar to the scheme described here for the movements of  $\text{Ca}^{2+}$  induced by GTP (Irvine & Moor, 1987). We are currently investigating whether this putative action of  $\text{InsP}_4$  is related to GTP-activated  $\text{Ca}^{2+}$  movements and/or whether  $\text{InsP}_4$  may modulate GTP-induced  $\text{Ca}^{2+}$  translocation.

We extend our sincerest gratitude to our former colleagues Dr Teruko Ueda and Dr Sheau-Huei Chueh for their very considerable contributions to the work described, and to Mark Noel and Cindy Ebert for their excellent technical assistance. This work was supported by grant number NS19304 from the National Institutes of Health, and grant number DCB-8510225 from the National Science Foundation.

### References

- BAKER, P. F. (1986). GTP and calcium release. *Nature, Lond.* **320**, 395.
- BAUKAL, A. J., GUILLEMETTE, G., RUBIN, R. P., SPÄT, A. & CATT, K. J. (1985). Binding sites for inositol trisphosphate in the bovine adrenal cortex. *Biochem. biophys. Res. Commun.* **133**, 532–538.
- BERRIDGE, M. J. (1987). Inositol trisphosphate and diacylglycerol: Two interacting second messengers. *A. Rev. Biochem.* **56**, 159–193.
- BERRIDGE, M. J. & IRVINE, R. F. (1984). Inositol trisphosphate, a novel second messenger in cellular signal transduction. *Nature, Lond.* **312**, 315–321.
- BURGESS, G. M., GODFREY, P. P., MCKINNEY, J. S., BERRIDGE, M. J., IRVINE, R. F. & PUTNEY, J. W., JR (1984). The second messenger linking receptor activation to internal Ca release in liver. *Nature, Lond.* **309**, 63–66.
- BURGESS, G. M., MCKINNEY, J. S., FABIATO, A., LESLIE, B. A. & PUTNEY, J. W., JR (1983). Calcium pools in saponin-permeabilized guinea pig hepatocytes. *J. biol. Chem.* **258**, 15336–15345.
- BURTON, P. R. & LAVERI, L. A. (1985). The distribution, relationships to other organelles, and calcium-sequestering ability of smooth endoplasmic reticulum in frog olfactory axons. *J. Neurosci.* **5**, 3047–3060.
- CARAFOLI, E. (1987). Intracellular calcium homeostasis. *A. Rev. Biochem.* **56**, 305–433.
- CHUEH, S. H. & GILL, D. L. (1986). Inositol 1,4,5-trisphosphate and guanine nucleotides activate calcium release from endoplasmic reticulum via distinct mechanisms. *J. biol. Chem.* **261**, 13883–13886.
- CHUEH, S. H., MULLANEY, J. M., GHOSH, T. K., ZACHARY, A. L. & GILL, D. L. (1987). GTP and inositol 1,4,5-trisphosphate-activated intracellular calcium movements in neuronal and smooth muscle cell lines. *J. biol. Chem.* **262**, 13857–13864.
- COMERFORD, J. G. & DAWSON, A. P. (1988). The mechanism of action of GTP on  $\text{Ca}^{2+}$  efflux from rat liver microsomal vesicles; measurement of vesicle fusion by fluorescence energy transfer. *Biochem. J.* **249**, 89–93.
- DAWSON, A. P. (1985). GTP enhances inositol trisphosphate-stimulated  $\text{Ca}^{2+}$  release from rat liver microsomes. *FEBS Letts* **185**, 147–150.

- DAWSON, A. P., COMERFORD, J. G. & FULTON, D. V. (1986). The effect of GTP on inositol 1,4,5-trisphosphate-stimulated  $\text{Ca}^{2+}$  efflux from a rat liver microsomal fraction. *Biochem. J.* **234**, 311–315.
- DAWSON, A. P., HILLS, G. & COMERFORD, J. G. (1987). The mechanism of action of GTP on  $\text{Ca}^{2+}$  efflux from rat liver microsomal vesicles. *Biochem. J.* **244**, 87–92.
- DAWSON, A. P. & IRVINE, R. F. (1984). Inositol(1,4,5)trisphosphate-promoted  $\text{Ca}^{2+}$  release from microsomal fractions of rat liver. *Biochem. biophys. Res. Commun.* **120**, 858–864.
- ECKSTEIN, F. (1985). Nucleoside phosphorothioates. *A. Rev. Biochem.* **54**, 367–402.
- GILL, D. L. (1982a). Receptor-mediated modulation of plasma membrane calcium transport. *Horiz. Biochem. Biophys.* **6**, 199–236.
- GILL, D. L. (1982b). Sodium channel, sodium pump, and sodium–calcium exchange activities in synaptosomal plasma membrane vesicles. *J. biol. Chem.* **257**, 10986–10990.
- GILL, D. L. (1985). Receptors coupled to calcium mobilization. *Adv. cyclic Nucleotide Protein Phos. Res.* **19**, 195–212.
- GILL, D. L. & CHUEH, S. H. (1985). An intracellular (ATP +  $\text{Mg}^{2+}$ )-dependent calcium pump within the N1E-115 neuronal cell line. *J. biol. Chem.* **260**, 9289–9297.
- GILL, D. L., CHUEH, S. H. & WHITLOW, C. L. (1984). Functional importance of the synaptic plasma membrane calcium pump and sodium–calcium exchanger. *J. biol. Chem.* **259**, 10807–10813.
- GILL, D. L., GROLLMAN, E. F. & KOHN, L. D. (1981). Calcium transport mechanisms in membrane vesicles from guinea pig brain synaptosomes. *J. biol. Chem.* **256**, 184–192.
- GILL, D. L., UEDA, T., CHUEH, S. H. & NOEL, M. W. (1986).  $\text{Ca}^{2+}$  release from endoplasmic reticulum is mediated by a guanine nucleotide regulatory mechanism. *Nature, Lond.* **320**, 461–464.
- GHOSH, T. K., EIS, P. S., MULLANEY, J. M., EBERT, C. L. & GILL, D. L. (1988). Competitive, reversible, and potent antagonism of inositol 1,4,5-trisphosphate-activated calcium release by heparin. *J. biol. Chem.* **263** (in press).
- HAMACHI, T., HIRATA, M., KIMURA, Y., IKEBE, T., ISHIMATSU, T., YAMAGUCHI, K. & KOGA, T. (1987). Effect of guanosine triphosphate on the release and uptake of  $\text{Ca}^{2+}$  in saponin-permeabilized macrophages and the skeletal-muscle sarcoplasmic reticulum. *Biochem. J.* **242**, 253–260.
- HANSFORD, R. G. (1985). Relation between mitochondrial calcium transport and control of energy metabolism. *Rev. Physiol. Biochem. Pharmac.* **102**, 1–72.
- HENKART, M. P., REESE, T. S. & BRINLEY, F. J. (1978). Endoplasmic reticulum sequesters calcium in the squid giant axon. *Science* **202**, 1300–1303.
- HENNE, V. & SÖLING, H.-D. (1986). Guanosine 5'-triphosphate releases calcium from rat liver and guinea pig parotid gland endoplasmic reticulum independently of inositol 1,4,5-trisphosphate. *FEBS Letts* **202**, 267–273.
- HOKIN, M. R. & HOKIN, L. E. (1953). Enzyme secretion and the incorporation of  $^{32}\text{P}$  into phospholipids of pancreas slices. *J. biol. Chem.* **203**, 967–977.
- HUI, S. W., ISAC, T., BONI, L. T. & SEN, A. (1985). Action of polyethylene glycol on the fusion of human erythrocyte membranes. *J. Membr. Biol.* **84**, 137–146.
- IRVINE, R. F. & MOOR, R. M. (1986). Micro-injection of inositol 1,3,4,5-tetrakisphosphate activates sea urchin eggs by a mechanism dependent on external  $\text{Ca}^{2+}$ . *Biochem. J.* **240**, 917–920.
- IRVINE, R. F. & MOOR, R. M. (1987). Inositol(1,3,4,5)tetrakisphosphate-induced activation of sea urchin eggs requires the presence of inositol trisphosphate. *Biochem. biophys. Res. Commun.* **146**, 284–290.
- JEAN, B. & KLEE, C. B. (1986). Calcium modulation of inositol 1,4,5-trisphosphate-induced calcium release from neuroblastoma X glioma hybrid (NG108-15) microsomes. *J. biol. Chem.* **261**, 16414–16420.
- KIMURA, N. & SHIMADA, N. (1983). GDP does not mediate but rather inhibits hormonal signal to adenylate cyclase. *J. biol. Chem.* **258**, 2278–2283.
- MCGRATH, C. F., SOMLYO, A. V. & BLAUSTEIN, M. P. (1980). Localization of calcium in presynaptic nerve terminals. *J. Cell Biol.* **85**, 228–241.

- MAJERUS, P. W., CONNOLLY, T. M., DECKMYN, H., ROSS, T. S., BROSS, T. E., ISHII, H., BANSAL, V. S. & WILSON, D. B. (1986). The metabolism of phosphoinositide-derived messenger molecules. *Science* **234**, 1519–1526.
- MARTONOSI, A. N. (1982). Transport of calcium by sarcoplasmic reticulum. In *Calcium in Cell Function*, vol. 3 (ed. W. Y. Cheung), pp. 37–102. New York: Academic Press.
- MICHELL, R. H. (1986). A second messenger function for inositol tetrakisphosphate. *Nature, Lond.* **324**, 613.
- MILLER, R. J. (1987). Multiple calcium channels and neuronal function. *Science* **235**, 46–52.
- MORRIS, A. P., GALLACHER, D. V., IRVINE, R. F. & PETERSEN, O. H. (1987). Synergism of inositol trisphosphate and inositol tetrakisphosphate in activating  $\text{Ca}^{2+}$ -dependent  $\text{K}^+$  channels. *Nature, Lond.* **330**, 653–655.
- MUALLEM, S., SCHOEFFIELD, M., PANDOL, S. & SACHS, G. (1985). Inositol trisphosphate modification of ion transport in rough endoplasmic reticulum. *Proc. natn. Acad. Sci. U.S.A.* **82**, 4433–4437.
- MULLANEY, J. M., CHUEH, S. H., GHOSH, T. K. & GILL, D. L. (1987). Intracellular calcium uptake activated by GTP; evidence for a possible guanine nucleotide-induced transmembrane conveyance of intracellular calcium. *J. biol. Chem.* **262**, 13 865–13 872.
- MULLANEY, J. M., YU, M., GHOSH, T. K. & GILL, D. L. (1988). A GTP-regulatory mechanism mediates calcium entry into the inositol 1,4,5-trisphosphate-releasable calcium pool. *Proc. natn. Acad. Sci. U.S.A.* **85**, 2499–2503.
- NICCHITTA, C. V., JOSEPH, S. K. & WILLIAMSON, J. R. (1986). Polyethylene glycol-stimulated microsomal GTP hydrolysis; relationship to GTP-mediated  $\text{Ca}^{2+}$  release. *FEBS Letts* **209**, 243–248.
- NORRIS, J. S., GORSKI, J. & KOHLER, P. O. (1974). Androgen receptors in a Syrian hamster ductus deferens tumour cell line. *Nature, Lond.* **248**, 422–424.
- POZZAN, T., VOLPE, P., ZORZATO, F., BRAVIN, M., KRAUSE, K. H., LEW, D. P., HASHIMOTO, S., BRUNO, B. & MELDOLESI, J. (1988). The  $\text{Ins}(1,4,5)\text{P}_3$ -sensitive calcium store of non-muscle cells: endoplasmic reticulum or calciosomes. *J. exp. Biol.* **139**, 181–193.
- PUTNEY, J. W. (1986). A model for receptor-regulated calcium entry. *Cell Calcium* **7**, 1–12.
- PUTNEY, J. W. (1988). The role of phosphoinositide metabolism in signal transduction in secretory cells. *J. exp. Biol.* **139**, 135–150.
- SMITH, J. B., SMITH, L. & HIGGINS, B. L. (1985). Temperature and nucleotide dependence of calcium release by myo-inositol 1,4,5-trisphosphate in cultured vascular smooth muscle cells. *J. biol. Chem.* **260**, 14 413–14 416.
- SPÄT, A., BRADFORD, P. G., MCKINNEY, J. S., RUBIN, R. P. & PUTNEY, J. W., Jr (1986). A saturable receptor for  $^{32}\text{P}$ -inositol-1,4,5-trisphosphate in hepatocytes and neutrophils. *Nature, Lond.* **319**, 514–516.
- SPÄT, A., LUKÁCS, G. L., EBERHARDT, I., KIESEL, L. & RUNNEBAUM, B. (1987). Binding of inositol phosphates and induction of  $\text{Ca}^{2+}$  release from pituitary microsomal fractions. *Biochem. J.* **244**, 493–496.
- STREB, H., IRVINE, R. F., BERRIDGE, M. J. & SCHULZ, I. (1983). Release of  $\text{Ca}^{2+}$  from a nonmitochondrial intracellular store in pancreatic acinar cells by inositol 1,4,5-trisphosphate. *Nature, Lond.* **306**, 67–69.
- SUPATTAPONE, S., WORLEY, P. F., BARABAN, J. M. & SNYDER, S. H. (1988). Solubilization, purification, and characterization of an inositol trisphosphate receptor. *J. biol. Chem.* **263**, 1530–1534.
- TSIEN, R. W., BEAN, B. P., HESS, P., LANSMAN, J. B., NILIUS, B. & NOWYCKY, M. C. (1986). Mechanisms of calcium channel modulation by  $\beta$ -adrenergic agents and dihydropyridine calcium agonists. *J. molec. cell. Cardiol.* **18**, 691–710.
- UEDA, T., CHUEH, S. H., NOEL, M. W. & GILL, D. L. (1986). Influence of inositol 1,4,5-trisphosphate and guanine nucleotides on intracellular calcium release within the N1E-115 neuronal cell line. *J. biol. Chem.* **261**, 3184–3192.
- VOLPE, P., KRAUSE, K.-H., HASHIMOTO, S., ZORZATO, F., POZZAN, T., MELDOLESI, J. & LEW, D. P. (1988). “Calciosome”, a cytoplasmic organelle: The inositol 1,4,5-trisphosphate-sensitive  $\text{Ca}^{2+}$  store of nonmuscle cells? *Proc. natn. Acad. Sci. U.S.A.* **85**, 1091–1095.
- WAKASUGI, H., KIMURA, T., HAASE, W., KRIBBEN, A., KAUFMANN, R. & SCHULZ, I. (1982).

- Calcium uptake into acini from rat pancreas: evidence for intracellular ATP-dependent calcium sequestration. *J. Membr. Biol.* **65**, 205–220.
- WORLEY, P. F., BARABAN, J. M., SUPATTAPONE, S., WILSON, V. S. & SNYDER, S. H. (1987). Characterization of inositol trisphosphate receptor binding in brain. *J. biol. Chem.* **262**, 12 132–12 136.
